# Supplementary material for: Impact of chemotherapy for breast cancer on leukocyte DNA methylation landscape and cognitive function: a prospective study
Source: Clin Epigenetics. 2019 Mar 12;11:45. doi: 10.1186/s13148-019-0641-1 (PMC6416954; doi:10.1186/s13148-019-0641-1)
Supplement: Supplementary file 2 — Table S2. Summary statistics of the 568 CpGs which remain significantly altered by chemotherapy after adjustment for leukocyte composition. (PDF 282 kb) [file 13148_2019_641_MOESM2_ESM.pdf]

| ILMNID     | logFC      | AveExpr    | P.Value  | GENOME_B | CHR | MAPINFO   | UCSC_REFG   | UCSC_REFG | UCSC_REFGENE_GRO        | UCSC_CPG    | RELATION | PHANTOM     | DMR  | ENHANCER | HMM_ISLAN   | REGULATOR    | REGULATOR    | DHS    | Index  |
|------------|------------|------------|----------|----------|-----|-----------|-------------|-----------|-------------------------|-------------|----------|-------------|------|----------|-------------|--------------|--------------|--------|--------|
| cg16936953 | -0.2622273 | 0.2673594  | 1.71E-16 | 37       | 17  | 57915665  | TMEM49      | NM_030938 | Body                    | NA          | NA       | low-CpG:552 | NA   | NA       | NA          | NA           | NA           | NA     | 310947 |
| cg19956914 | 0.09252384 | -0.0671882 | 4.56E-16 | 37       | 7   | 56147257  | SUMF2;SUM   | NM_001042 | Body;Body;Body;Body     | NA          | NA       | NA          | NA   | TRUE     | NA          | 7:56146865   | Gene_Assoc   | TRUE   | 359545 |
| cg12054453 | -0.2001315 | 0.2240511  | 6.95E-15 | 37       | 17  | 57915717  | TMEM49      | NM_030938 | Body                    | NA          | NA       | low-CpG:552 | NA   | NA       | NA          | NA           | NA           | NA     | 225475 |
| cg06827038 | 0.05004178 | -0.0413071 | 1.69E-14 | 37       | 17  | 48912952  | WFIKN2;W    | NM_175575 | 1stExon;5'UTR           | NA          | NA       | NA          | NA   | NA       | 17:46267446 | NA           | NA           | NA     | 133233 |
| cg08173263 | 0.25841685 | -0.2560454 | 2.67E-14 | 37       | 19  | 14276911  | LPHN1;LPHN  | NM_014921 | Body;Body               | chr19:14273 | S_Shelf  | NA          | NA   | TRUE     | NA          | 19:14276822  | Unclassified | NA     | 158664 |
| cg11859398 | 0.17279342 | -0.1170906 | 2.70E-14 | 37       | 7   | 3411503   | SDK1        | NM_152744 | Body                    | NA          | NA       | NA          | DMR  | TRUE     | NA          | NA           | NA           | NA     | 222277 |
| cg01252023 | 0.08824122 | -0.0675643 | 3.52E-14 | 37       | 11  | 67207574  | CORO1B;CO   | NM_001018 | Body;Body               | chr11:67203 | S_Shelf  | NA          | NA   | NA       | 11:66964001 | NA           | NA           | NA     | 26238  |
| cg05715492 | 0.1123228  | -0.0882284 | 3.63E-14 | 37       | 7   | 98991138  | ARPC1B      | NM_005720 | Body                    | chr7:989901 | S_Shore  | NA          | CDMR | TRUE     | 7:98828146  | 7:98990227   | Promoter_A   | TRUE   | 112976 |
| cg17445936 | 0.07149699 | -0.0468052 | 4.57E-14 | 37       | 1   | 3090345   | PRDM16;PR   | NM_022114 | Body;Body               | NA          | NA       | NA          | NA   | NA       | 1:3079749-3 | NA           | NA           | NA     | 319165 |
| cg23973524 | 0.09588504 | -0.0925909 | 1.18E-13 | 37       | 19  | 18873222  | CRTC1;CRTC  | NM_015321 | Body;Body               | chr19:18873 | Island   | NA          | NA   | NA       | 19:1873402  | NA           | NA           | TRUE   | 421430 |
| cg24420089 | 0.10064794 | -0.081808  | 1.34E-13 | 37       | 11  | 457304    | PTDS52      | NM_030783 | Body                    | chr11:45908 | N_Shore  | NA          | NA   | NA       | 11:447256-4 | 11:456465-4  | Unclassified | NA     | 428664 |
| cg01409343 | -0.2328717 | 0.21861979 | 1.34E-13 | 37       | 17  | 57915740  | TMEM49      | NM_030938 | Body                    | NA          | NA       | low-CpG:552 | NA   | NA       | NA          | NA           | NA           | NA     | 29286  |
| cg06647693 | 0.12822382 | -0.1022288 | 1.66E-13 | 37       | 16  | 88590340  | ZFPM1       | NM_153813 | Body                    | chr16:88590 | Island   | NA          | NA   | NA       | 16:87117783 | NA           | NA           | NA     | 129668 |
| cg15283950 | 0.09780537 | -0.0805671 | 2.49E-13 | 37       | 11  | 10715217  | MRV11;MRV   | NM_001100 | 1stExon;5'UTR;1stExon   | NA          | NA       | low-CpG:106 | NA   | TRUE     | NA          | NA           | NA           | NA     | 283209 |
| cg26709300 | 0.10241641 | -0.1122991 | 2.89E-13 | 37       | 16  | 30106682  | YPEL3;YPEL3 | NM_031477 | 1stExon;Body            | chr16:30107 | N_Shore  | NA          | NA   | TRUE     | 16:30014183 | NA           | NA           | NA     | 466075 |
| cg11303839 | -0.2157546 | 0.22230688 | 3.79E-13 | 37       | 7   | 75405967  | CCL26       | NM_006072 | NA                      | NA          | NA       | NA          | NA   | NA       | 7:75405958  | Unclassified | NA           | 212943 |        |
| cg24693803 | 0.07362217 | -0.0705283 | 5.59E-13 | 37       | 4   | 171013537 | NA          | NA        | NA                      | chr4:171010 | S_Shelf  | NA          | NA   | NA       | 4:171250051 | NA           | NA           | NA     | 433238 |
| cg21867733 | 0.07485671 | -0.0691131 | 6.54E-13 | 37       | 12  | 124985584 | NCOR2;NCO   | NM_006312 | 5'UTR;5'UTR             | NA          | NA       | NA          | NA   | TRUE     | 12:12355137 | NA           | NA           | TRUE   | 388475 |
| cg18942579 | -0.187228  | 0.20011295 | 7.92E-13 | 37       | 17  | 57915773  | TMEM49      | NM_030938 | Body                    | NA          | NA       | low-CpG:552 | NA   | NA       | 17:57915757 | Promoter_A   | NA           | NA     | 343287 |
| cg13485366 | 0.09358523 | -0.0872452 | 1.14E-12 | 37       | 9   | 137174989 | NA          | NA        | NA                      | NA          | NA       | NA          | NA   | TRUE     | NA          | NA           | NA           | TRUE   | 248731 |
| cg24277817 | 0.09648754 | -0.0812236 | 1.38E-12 | 37       | 19  | 13135662  | NFIX        | NM_002501 | Body                    | chr19:13135 | Island   | low-CpG:129 | NA   | NA       | 19:12996280 | NA           | NA           | NA     | 426383 |
| cg09938049 | 0.06552559 | -0.0652706 | 1.54E-12 | 37       | 12  | 54747206  | NA          | NA        | NA                      | NA          | NA       | NA          | NA   | TRUE     | NA          | NA           | NA           | NA     | 189632 |
| cg14242895 | 0.10407159 | -0.086074  | 1.55E-12 | 37       | 11  | 118393450 | MLL         | NM_005933 | 3'UTR                   | NA          | NA       | NA          | NA   | NA       | 11:11839317 | Gene_Assoc   | NA           | NA     | 264546 |
| cg23989207 | 0.08397289 | -0.0442871 | 1.83E-12 | 37       | 17  | 80870107  | TBCD        | NM_005993 | Body                    | chr17:80871 | N_Shore  | NA          | NA   | NA       | 17:78463396 | NA           | NA           | NA     | 421723 |
| cg01751245 | -0.1972889 | 0.20433263 | 1.91E-12 | 37       | 2   | 65593761  | SPRED2;SPR  | NM_001128 | 5'UTR;1stExon;Body      | NA          | NA       | NA          | NA   | TRUE     | NA          | NA           | NA           | TRUE   | 35835  |
| cg10753966 | 0.09968469 | -0.1033172 | 1.95E-12 | 37       | 3   | 55556197  | ERC2        | NM_015576 | 3'UTR                   | NA          | NA       | NA          | NA   | TRUE     | NA          | NA           | NA           | NA     | 203729 |
| cg21154227 | 0.07317468 | -0.0501941 | 2.17E-12 | 37       | 4   | 57904332  | IGFBP7      | NM_001553 | Body                    | NA          | NA       | NA          | NA   | TRUE     | NA          | 4:57903701   | Unclassified | TRUE   | 377635 |
| cg24878115 | 0.12963311 | -0.1137889 | 2.26E-12 | 37       | 19  | 18545062  | SSBP4;SSBP4 | NM_032627 | 3'UTR;3'UTR             | chr19:18543 | Island   | NA          | NA   | NA       | 19:18404916 | 19:18543757  | Unclassified | NA     | 436405 |
| cg10549018 | 0.10598415 | -0.0909524 | 2.65E-12 | 37       | 10  | 98176740  | TLL2        | NM_012465 | Body                    | NA          | NA       | NA          | NA   | TRUE     | NA          | NA           | NA           | NA     | 200415 |
| cg22761205 | 0.07880295 | -0.070848  | 2.76E-12 | 37       | 11  | 457256    | PTDS2       | NM_030783 | Body                    | chr11:45908 | N_Shore  | NA          | NA   | NA       | 11:447256-4 | 11:456465-4  | Unclassified | NA     | 401597 |
| cg17501210 | -0.1533787 | 0.17673271 | 3.30E-12 | 37       | 6   | 166970252 | RP56KA2;RP  | NM_021135 | Body;Body               | NA          | NA       | NA          | RDMR | NA       | NA          | NA           | TRUE         | 320131 |        |
| cg22902505 | 0.13262803 | -0.1111155 | 3.47E-12 | 37       | 4   | 81119473  | PRDM8;PRDM  | NM_020226 | 5'UTR;5'UTR             | chr4:811181 | S_Shore  | NA          | NA   | NA       | 4:81338101  | NA           | NA           | NA     | 404009 |
| cg22778120 | 0.08590531 | -0.0663042 | 3.48E-12 | 37       | 22  | 45094531  | PRR5;PRR5   | NM_001017 | 5'UTR;5'UTR;5'UTR;5'UTR | chr22:45097 | N_Shelf  | NA          | RDMR | TRUE     | NA          | NA           | NA           | TRUE   | 401831 |
| cg06307913 | 0.17945762 | -0.1641137 | 3.51E-12 | 37       | 4   | 81118794  | PRDM8;PRDM  | NM_020226 | 5'UTR;1stExon;5'UTR     | chr4:811190 | N_Shore  | NA          | NA   | NA       | 4:81118358  | Unclassified | NA           | NA     | 123528 |
| cg03561416 | 0.0553215  | -0.0487209 | 3.78E-12 | 37       | 6   | 157254584 | ARID1B;ARID | NM_017519 | Body;Body;Body          | NA          | NA       | NA          | NA   | TRUE     | NA          | NA           | NA           | NA     | 72040  |
| cg02023728 | 0.13788256 | -0.1058241 | 4.16E-12 | 37       | 11  | 77925099  | USP35       | NM_020798 | 3'UTR                   | chr11:77921 | S_Shelf  | NA          | NA   | TRUE     | NA          | NA           | NA           | NA     | 41511  |
| cg03829194 | 0.08749342 | -0.068622  | 4.30E-12 | 37       | 16  | 875571    | NA          | NA        | NA                      | chr16:87510 | Island   | NA          | NA   | TRUE     | 16:814282-8 | NA           | NA           | TRUE   | 77198  |
| cg22153728 | 0.07634917 | -0.065301  | 4.34E-12 | 37       | 1   | 25291584  | RUNX3       | NM_001031 | TSS200                  | NA          | NA       | NA          | NA   | NA       | 1:25163972  | 1:25291322   | Unclassified | NA     | 392686 |
| cg21993290 | -0.0685025 | 0.0692106  | 4.87E-12 | 37       | 2   | 233703120 | GIGYF2;GIG  | NM_015575 | Body;Body;Body;Body     | NA          | NA       | NA          | NA   | TRUE     | NA          | 2:233703065  | Gene_Assoc   | NA     | 390303 |
| cg09109520 | 0.11386229 | -0.122112  | 5.19E-12 | 37       | 16  | 57673258  | GPR56;GPR5  | NM_001145 | 5'UTR;5'UTR;5'UTR;5'UTR | NA          | NA       | NA          | NA   | NA       | NA          | NA           | NA           | NA     | 175192 |
| cg11639950 | 0.05204619 | -0.0160348 | 5.69E-12 | 37       | 12  | 125003407 | NCOR2;NCO   | NM_006312 | 5'UTR;5'UTR             | chr12:12500 | Island   | NA          | RDMR | TRUE     | 12:12356873 | NA           | NA           | NA     | 218232 |
| cg26432350 | 0.10412858 | -0.0985446 | 5.87E-12 | 37       | 3   | 47040357  | NBEAL2      | NM_015175 | Body                    | NA          | NA       | NA          | NA   | NA       | 3:47015218  | 3:47039622   | Gene_Assoc   | NA     | 461266 |
| cg10493186 | 0.12088323 | -0.100672  | 6.29E-12 | 37       | 1   | 3134756   | PRDM16;PR   | NM_022114 | Body;Body               | NA          | NA       | NA          | NA   | NA       | 1:3123982-3 | NA           | NA           | NA     | 199262 |
| cg00153395 | 0.06640361 | -0.0517784 | 6.72E-12 | 37       | 1   | 65327523  | JAK1        | NM_002227 | Body                    | NA          | NA       | NA          | NA   | TRUE     | NA          | 1:65327163   | Unclassified | NA     | 3440   |
| cg00460436 | 0.06063667 | -0.039384  | 7.48E-12 | 37       | 16  | 4401729   | Magmas      | NM_016069 | TSS1500                 | chr16:44009 | S_Shore  | NA          | NA   | NA       | NA          | 16:4400653   | Promoter_A   | NA     | 9726   |
| cg03463411 | 0.13319831 | -0.1159325 | 7.53E-12 | 37       | 4   | 81118188  | PRDM8;PRDM  | NM_001099 | TSS1500;5'UTR           | chr4:811181 | Island   | NA          | NA   | NA       | 4:81336961  | NA           | NA           | NA     | 70030  |
| cg27242132 | 0.15782078 | -0.1265964 | 7.79E-12 | 37       | 4   | 81119178  | PRDM8;PRDM  | NM_020226 | 5'UTR;5'UTR             | chr4:811190 | Island   | NA          | NA   | NA       | 4:81338101  | 4:81118358   | Unclassified | NA     | 475212 |
| cg21646032 | -0.0943478 | 0.10865854 | 8.23E-12 | 37       | 3   | 25623905  | RARB;RARB   | NM_016152 | Body;Body               | NA          | NA       | NA          | NA   | TRUE     | NA          | NA           | NA           | TRUE   | 385323 |
| cg25953130 | -0.1646124 | 0.15790135 | 8.26E-12 | 37       | 10  | 63753550  | ARID5B      | NM_032199 | Body                    | NA          | NA       | NA          | NA   | TRUE     | NA          | NA           | NA           | NA     | 453012 |
| cg05208178 | 0.03885806 | -0.0405    | 8.47E-12 | 37       | 2   | 233928423 | INPP5D;INPP | NM_005541 | Body;Body               | chr2:233925 | S_Shelf  | NA          | DMR  | NA       | NA          | 2:233925718  | Promoter_A   | NA     | 103599 |
| cg26282236 | 0.11268744 | -0.1100402 | 8.86E-12 | 37       | 12  | 1025755   | RAD52       | NM_134424 | Body                    | NA          | NA       | NA          | NA   | NA       | 12:895636-8 | NA           | NA           | NA     | 458588 |
| cg14145338 | 0.08724819 | -0.0717372 | 1.03E-11 | 37       | 9   | 139649039 | LCN8        | NM_178469 | Body                    | NA          | NA       | NA          | NA   | NA       | 9:13876878  | NA           | NA           | NA     | 262385 |
| cg11848788 | -0.0684347 | 0.04902476 | 1.04E-11 | 37       | 1   | 39041399  | NA          | NA        | NA                      | chr1:390440 | N_Shelf  | NA          | NA   | NA       | NA          | 1:39041348   | Unclassified | NA     | 222051 |
| cg26299084 | 0.13171833 | -0.1111933 | 1.16E-11 | 37       | 4   | 81118588  | PRDM8;PRDM  | NM_020226 | 5'UTR;TSS200            | chr4:811181 | Island   | NA          | NA   | NA       | 4:81336961  | 4:81118358   | Unclassified | NA     | 458882 |
| cg25446789 | -0.1058468 | 0.12138812 | 1.18E-11 | 37       | 2   | 25810393  | DTNB;DTNB   | NM_183361 | Body;Body;Body;Body     | NA          | NA       | NA          | NA   | TRUE     | NA          | 2:25810375   | Unclassified | NA     | 445348 |
| cg21183455 | 0.06802056 | -0.0483173 | 1.20E-11 | 37       | 22  | 50052396  | C2orf34     | NR_026997 | TSS1500                 | NA          | NA       | NA          | NA   | NA       | 22:50052284 | Unclassified | NA           | NA     | 378196 |
| cg07435331 | 0.07172456 | -0.0388404 | 1.29E-11 | 37       | 17  | 21178476  | NA          | NA        | NA                      | chr17:21178 | N_Shore  | NA          | NA   | NA       | NA          | NA           | NA           | NA     | 145046 |
| cg04509882 | 0.07997716 | -0.0524453 | 1.32E-11 | 37       | 3   | 184038317 | EIF4G1;EIF4 | NM_198241 | Body;Body;Body;Body     | NA          | NA       | low-CpG:185 | NA   | NA       | NA          | NA           | NA           | TRUE   | 90368  |
| cg11261850 | 0.09481032 | -0.0833498 | 1.38E-11 | 37       | 11  | 76320970  | NA          | NA        | NA                      | NA          | NA       | NA          | NA   | TRUE     | NA          | NA           | NA           | NA     | 212269 |
| cg20460227 | 0.06999472 | -0.0466908 | 1.46E-11 | 37       | 2   | 120452632 | NA          | NA        | NA                      | NA          | NA       | NA          | NA   | TRUE     | NA          | 2:120452553  | Unclassified | TRUE   | 367073 |
| cg20507228 | 0.15697509 | -0.1483379 | 1.48E-11 | 37       | 15  | 91460071  | MAN2A2      | NM_006122 | Body                    | NA          | NA       | NA          | NA   | TRUE     | NA          | 15:91459961  | Promoter_A   | NA     | 367793 |
| cg11950754 | 0.07809736 | -0.065873  | 1.56E-11 | 37       | 1   | 53782077  | LRP8;LRP8   | NM_033300 | Body;Body;Body;Body     | NA          | NA       | NA          | NA   | TRUE     | NA          | NA           | NA           | NA     | 223772 |
| cg10420527 |            |            |          |          |     |           |             |           |                         |             |          |             |      |          |             |              |              |        |        |

|             |            |            |          |    |    |           |             |           |                       |              |         |             |      |      |             |             |              |              |        |        |
|-------------|------------|------------|----------|----|----|-----------|-------------|-----------|-----------------------|--------------|---------|-------------|------|------|-------------|-------------|--------------|--------------|--------|--------|
| cg27115863  | -0.1439506 | 0.16595535 | 1.81E-11 | 37 | 22 | 37921640  | NA          | NA        | NA                    | NA           | NA      | NA          | DMR  | TRUE | NA          | NA          | NA           | TRUE         | 473147 |        |
| cg12798040  | 0.12793821 | -0.1279304 | 1.95E-11 | 37 | 14 | 104171840 | XRC3;XRC3   | NM_001100 | Body;Body;Body        | NA           | NA      | NA          | NA   | NA   | NA          | 14:10324136 | NA           | NA           | NA     | 237366 |
| cg14438453  | 0.12760313 | -0.0851365 | 2.08E-11 | 37 | 6  | 39786566  | DAAM2       | NM_015345 | 5'UTR                 | NA           | NA      | NA          | NA   | TRUE | NA          | NA          | NA           | NA           | 268454 |        |
| cg27093918  | -0.0874793 | 0.09616544 | 2.14E-11 | 37 | 16 | 69564625  | NA          | NA        | NA                    | NA           | NA      | NA          | DMR  | TRUE | NA          | 16:69564532 | Promoter_A5  | TRUE         | 472772 |        |
| cg23605961  | 0.11012014 | -0.0553074 | 2.18E-11 | 37 | 7  | 751331    | PKAR18;PR   | NM_002735 | 5'UTR;5'UTR;5'UTR;5'  | chr7:751712  | N_Shore | NA          | NA   | NA   | NA          | 7:717343-71 | NA           | NA           | TRUE   | 415501 |
| cg22508831  | -0.1062662 | 0.10161154 | 2.41E-11 | 37 | 22 | 40573204  | TNR68;TNR   | NM_001024 | Body;TSS1500;TSS1500  | NA           | NA      | NA          | NA   | NA   | NA          | 22:40573013 | Promoter_A5  | NA           | 397733 |        |
| cg17417856  | -0.1277042 | 0.12097025 | 2.48E-11 | 37 | 19 | 50191637  | PRMT1;C19c  | NM_001536 | 3'UTR;TSS1500;3'UTR   | chr19:501924 | N_Shore | NA          | NA   | NA   | NA          | NA          | NA           | NA           | 318711 |        |
| cg25214914  | 0.05637796 | -0.0288136 | 2.59E-11 | 37 | 1  | 155910523 | RXF4        | NM_181885 | TSS1500               | NA           | NA      | NA          | NA   | NA   | NA          | 1:155910341 | Unclassified | NA           | 441730 |        |
| cg10843276  | 0.11892337 | -0.1170302 | 2.63E-11 | 37 | 4  | 726697    | PCGF3       | NM_006315 | 5'UTR                 | chr4:724335  | S_Shore | NA          | NA   | NA   | NA          | 4:716385-71 | NA           | NA           | 205367 |        |
| cg08822118  | 0.07658383 | -0.0528464 | 2.65E-11 | 37 | 3  | 184037481 | E1F4G1;E1F4 | NM_198241 | Body;Body;TSS1500;5'  | NA           | NA      | low-CpG:185 | NA   | TRUE | NA          | NA          | NA           | TRUE         | 170178 |        |
| cg01418153  | 0.08648146 | -0.0637685 | 2.80E-11 | 37 | 1  | 3240129   | PRDM16;PR   | NM_022114 | Body;Body             | chr1:323991  | Island  | NA          | NA   | NA   | NA          | 1:3229442-3 | NA           | NA           | NA     | 29492  |
| cg26165146  | -0.1208445 | 0.13059873 | 2.92E-11 | 37 | 12 | 27484656  | ARNTL2      | NM_020183 | TSS1500               | chr12:27485  | N_Shore | NA          | RDMR | NA   | NA          | NA          | NA           | TRUE         | 456598 |        |
| cg06378491  | 0.05909535 | -0.046562  | 3.13E-11 | 37 | 11 | 64564012  | MAP4K2      | NM_004579 | Body                  | NA           | NA      | NA          | NA   | NA   | NA          | NA          | NA           | NA           | 124748 |        |
| cg18181703  | -0.1101846 | 0.11115366 | 3.14E-11 | 37 | 17 | 76354621  | SOC5        | NM_003955 | Body                  | chr17:76354  | N_Shore | NA          | NA   | NA   | NA          | 17:73866128 | Promoter_A5  | NA           | 330978 |        |
| cg22878489  | 0.1012436  | -0.0900032 | 3.40E-11 | 37 | 6  | 33245701  | B3GALT4     | NM_003782 | 1stExon               | chr6:332446  | S_Shore | NA          | NA   | TRUE | 6:33352687  | 6:33244505  | Promoter_A5  | TRUE         | 403631 |        |
| cg14029001  | 0.0764577  | -0.0623119 | 3.84E-11 | 37 | 6  | 41998500  | CND3;CND    | NM_001136 | 5'UTR;5'UTR           | NA           | NA      | NA          | NA   | TRUE | NA          | NA          | NA           | NA           | 260028 |        |
| cg01154283  | 0.09575413 | -0.0565443 | 3.93E-11 | 37 | 2  | 36603543  | CRIM1       | NM_016441 | Body                  | NA           | NA      | NA          | NA   | TRUE | NA          | NA          | NA           | NA           | 24310  |        |
| cg19309676  | -0.1108898 | 0.09708504 | 4.15E-11 | 37 | 19 | 50191439  | C19orf76;PR | NM_001101 | TSS1500;Body;Body;Bc  | chr19:50191  | Island  | NA          | NA   | NA   | NA          | NA          | NA           | NA           | 348671 |        |
| cg26105278  | -0.0460512 | 0.03699044 | 4.16E-11 | 37 | 1  | 3624054   | TP73;TP73;T | NM_001126 | Body;Body;Body;Body   | chr1:362331  | S_Shore | NA          | NA   | NA   | NA          | 1:3613683-3 | NA           | NA           | TRUE   | 455457 |
| cg18096987  | 0.06753141 | -0.0480959 | 4.35E-11 | 37 | 3  | 11623873  | VGLL4;VGLL  | NM_014667 | Body;TSS200;Body      | NA           | NA      | NA          | NA   | TRUE | NA          | 3:11623723  | Unclassified | TRUE         | 329387 |        |
| cg00317577  | 0.07364932 | -0.0669791 | 4.78E-11 | 37 | 15 | 83239908  | CPEB1;CPEB  | NM_001079 | Body;Body;Body;Body   | NA           | NA      | NA          | NA   | TRUE | NA          | NA          | NA           | NA           | 6671   |        |
| cg18099096  | 0.09146153 | -0.0627509 | 4.91E-11 | 37 | 4  | 23936764  | NA          | NA        | NA                    | NA           | NA      | NA          | NA   | TRUE | NA          | NA          | NA           | NA           | 329432 |        |
| cg27333952  | 0.08385479 | -0.0741955 | 4.93E-11 | 37 | 16 | 1509206   | CLCN7;CLCN  | NM_001287 | Body;Body             | chr16:15108  | N_Shore | NA          | NA   | NA   | NA          | 16:1449098  | NA           | NA           | NA     | 476858 |
| cg25310824  | 0.13768541 | -0.0889545 | 5.34E-11 | 37 | 5  | 42812334  | SEPP1;SEPP  | NM_005410 | TSS1500;TSS1500;TSS   | NA           | NA      | NA          | NA   | NA   | NA          | NA          | NA           | NA           | 443117 |        |
| cg04543901  | -0.1036169 | 0.07920682 | 5.41E-11 | 37 | 17 | 63519783  | NA          | NA        | NA                    | NA           | NA      | NA          | NA   | TRUE | NA          | 17:63519568 | Unclassified | NA           | 90997  |        |
| cg01109535  | -0.0591311 | 0.04850748 | 5.59E-11 | 37 | 16 | 24856104  | SLC5A11     | NM_052944 | TSS1500               | NA           | NA      | NA          | NA   | NA   | NA          | NA          | NA           | TRUE         | 23434  |        |
| cg01631333  | 0.07130688 | -0.051179  | 5.78E-11 | 37 | 13 | 110747452 | NA          | NA        | NA                    | NA           | NA      | NA          | NA   | TRUE | NA          | NA          | NA           | TRUE         | 33717  |        |
| cg21848084  | 0.07965028 | -0.0793289 | 6.22E-11 | 37 | 1  | 3264381   | PRDM16;PR   | NM_022114 | Body;Body             | NA           | NA      | NA          | NA   | NA   | NA          | 1:3264343-3 | Unclassified | NA           | 388166 |        |
| cg17103217  | 0.06367507 | -0.0611472 | 6.23E-11 | 37 | 6  | 33245721  | B3GALT4     | NM_003782 | 1stExon               | chr6:332446  | S_Shore | NA          | NA   | TRUE | 6:33352687  | 6:33244505  | Promoter_A5  | TRUE         | 313493 |        |
| cg09626867  | 0.06197012 | -0.0355915 | 6.73E-11 | 37 | 3  | 45053351  | EXOSC7      | NR_023353 | Body                  | NA           | NA      | NA          | NA   | TRUE | NA          | NA          | NA           | TRUE         | 184298 |        |
| cg06578342  | 0.05472739 | -0.0202282 | 7.12E-11 | 37 | 16 | 4349215   | NA          | NA        | NA                    | NA           | NA      | NA          | NA   | TRUE | NA          | NA          | NA           | NA           | 128305 |        |
| cg01289541  | -0.0519838 | 0.04766022 | 7.43E-11 | 37 | 3  | 170282058 | SLC7A14     | NM_020949 | 5'UTR                 | NA           | NA      | NA          | NA   | TRUE | NA          | NA          | NA           | NA           | 26926  |        |
| cg24911837  | -0.0742765 | 0.07458277 | 8.06E-11 | 37 | 7  | 65227864  | CCT6P1      | NR_003110 | Body                  | chr7:652293  | N_Shore | NA          | NA   | NA   | NA          | NA          | NA           | NA           | 436957 |        |
| cg06357748  | 0.11456672 | -0.1176304 | 8.57E-11 | 37 | 12 | 1025529   | RAD52       | NM_134424 | Body                  | NA           | NA      | NA          | NA   | NA   | NA          | 12:895636-8 | 12:1025443   | Gene_Assoc   | NA     | 124327 |
| cg00867472  | 0.06502921 | -0.0641464 | 8.70E-11 | 37 | 1  | 156714808 | HDBG;HDBG   | NM_001126 | Body;Body;Body        | chr1:156710  | S_Shelf | NA          | NA   | NA   | NA          | NA          | NA           | NA           | 18280  |        |
| cg03721978  | 0.05433248 | -0.0476476 | 8.85E-11 | 37 | 6  | 33245706  | B3GALT4     | NM_003782 | 1stExon               | chr6:332446  | S_Shore | NA          | NA   | TRUE | 6:33352687  | 6:33244505  | Promoter_A5  | TRUE         | 75196  |        |
| cg07336872  | -0.1126657 | 0.12254128 | 9.03E-11 | 37 | 6  | 150393535 | NA          | NA        | NA                    | chr6:150389  | S_Shelf | NA          | NA   | NA   | NA          | 6:15039337  | Unclassified | TRUE         | 143314 |        |
| cg08006309  | 0.07742829 | -0.0917804 | 9.86E-11 | 37 | 16 | 1587810   | IFT140;TME  | NM_014714 | Body;Body             | chr16:15876  | Island  | NA          | NA   | NA   | NA          | 16:1527106  | 16:1587536   | Unclassified | NA     | 155520 |
| cg26126879  | 0.07509709 | -0.0638828 | 1.01E-10 | 37 | 8  | 103916295 | NA          | NA        | NA                    | NA           | NA      | NA          | NA   | TRUE | NA          | NA          | NA           | NA           | 455859 |        |
| cg129292810 | -0.1335529 | 0.15135484 | 1.02E-10 | 37 | 3  | 184241840 | NA          | NA        | NA                    | chr3:184243  | N_Shore | NA          | NA   | NA   | NA          | NA          | NA           | TRUE         | 27008  |        |
| cg16536918  | 0.06470843 | -0.0525185 | 1.09E-10 | 37 | 20 | 3065403   | AVP         | NM_000490 | TSS200                | chr20:30630  | S_Shore | NA          | NA   | NA   | NA          | NA          | NA           | NA           | 304010 |        |
| cg03185794  | -0.0724857 | 0.05709307 | 1.18E-10 | 37 | 13 | 101237439 | NA          | NA        | NA                    | chr13:10124  | N_Shelf | NA          | NA   | NA   | NA          | 13:10123707 | Unclassified | NA           | 64690  |        |
| cg03848580  | 0.08279338 | -0.067649  | 1.19E-10 | 37 | 17 | 76113713  | TMC6;TMC6   | NM_001127 | Body;Body             | NA           | NA      | NA          | NA   | NA   | NA          | 17:73625246 | 17:76113116  | Unclassified | TRUE   | 77552  |
| cg23661483  | 0.09203007 | -0.0742422 | 1.21E-10 | 37 | 19 | 15227219  | ILVBL       | NM_006844 | Body                  | chr19:15224  | S_Shelf | NA          | NA   | NA   | NA          | NA          | NA           | NA           | 416503 |        |
| cg08843623  | 0.09841637 | -0.0887876 | 1.27E-10 | 37 | 16 | 85627648  | NA          | NA        | NA                    | NA           | NA      | NA          | NA   | TRUE | NA          | NA          | NA           | NA           | 170596 |        |
| cg08384239  | 0.06009976 | -0.0508003 | 1.27E-10 | 37 | 2  | 160041968 | TANC1;TANC  | NM_033394 | Body;Body             | NA           | NA      | NA          | NA   | TRUE | NA          | 2:160041913 | Unclassified | TRUE         | 162549 |        |
| cg08323969  | 0.06745321 | -0.0422378 | 1.28E-10 | 37 | 17 | 40770823  | NA          | NA        | NA                    | NA           | NA      | NA          | NA   | TRUE | NA          | 17:40770556 | Unclassified | TRUE         | 161523 |        |
| cg07803375  | 0.07653202 | -0.0556612 | 1.32E-10 | 37 | 7  | 811206    | HEATR2      | NM_017802 | Body                  | chr7:813627  | N_Shelf | NA          | NA   | TRUE | 7:777720-77 | NA          | NA           | NA           | 151848 |        |
| cg22098511  | 0.03110176 | -0.0345797 | 1.39E-10 | 37 | 17 | 79476521  | NA          | NA        | NA                    | chr17:79478  | N_Shore | NA          | RDMR | NA   | NA          | 17:79476269 | Promoter_A5  | NA           | 391849 |        |
| cg00711496  | -0.1447868 | 0.1405205  | 1.43E-10 | 37 | 19 | 50191497  | C19orf76;PR | NM_001101 | TSS1500;Body;Body;Bc  | chr19:50191  | Island  | NA          | NA   | NA   | NA          | NA          | NA           | NA           | 15037  |        |
| cg03127244  | 0.07917321 | -0.0768296 | 1.48E-10 | 37 | 6  | 33245638  | B3GALT4     | NM_003782 | 1stExon               | chr6:332446  | S_Shore | NA          | NA   | TRUE | 6:33352687  | 6:33244505  | Promoter_A5  | TRUE         | 63542  |        |
| cg19377250  | 0.06722725 | -0.0453553 | 1.58E-10 | 37 | 7  | 100463206 | SLC12A9     | NM_020246 | Body                  | chr7:100463  | N_Shore | NA          | CDMR | NA   | NA          | NA          | NA           | NA           | 349673 |        |
| cg09022230  | 0.09988697 | -0.0902687 | 1.58E-10 | 37 | 7  | 5457225   | TNRC18      | NM_001080 | Body                  | chr7:545850  | N_Shore | NA          | NA   | NA   | NA          | NA          | NA           | NA           | 173796 |        |
| cg04761746  | -0.0832354 | 0.10789253 | 1.60E-10 | 37 | 4  | 141177756 | SCOC        | NM_032547 | TSS1500               | chr4:141173  | S_Shelf | NA          | NA   | NA   | NA          | NA          | NA           | TRUE         | 95027  |        |
| cg19075787  | 0.07219177 | -0.0366969 | 1.69E-10 | 37 | 2  | 105372087 | NA          | NA        | NA                    | NA           | NA      | NA          | NA   | NA   | NA          | 2:104738513 | NA           | NA           | NA     | 345234 |
| cg02597894  | 0.08037379 | -0.0672562 | 2.02E-10 | 37 | 6  | 31760796  | VAR5        | NM_006295 | Body                  | chr6:317632  | N_Shelf | NA          | NA   | NA   | NA          | NA          | NA           | NA           | 52896  |        |
| cg17200690  | 0.07858407 | -0.0806387 | 2.04E-10 | 37 | 6  | 33245619  | B3GALT4     | NM_003782 | 1stExon               | chr6:332446  | S_Shore | NA          | NA   | TRUE | 6:33352687  | 6:33244505  | Promoter_A5  | TRUE         | 315149 |        |
| cg13027206  | 0.05649903 | -0.0669124 | 2.10E-10 | 37 | 14 | 91866325  | CDC88C      | NM_001080 | Body                  | NA           | NA      | NA          | DMR  | NA   | NA          | 14:9186615  | Unclassified | NA           | 240844 |        |
| cg06507987  | 0.06389174 | -0.0682857 | 2.26E-10 | 37 | 1  | 27686768  | MAP3K6      | NM_004672 | Body                  | chr1:276870  | N_Shore | NA          | NA   | NA   | NA          | NA          | NA           | NA           | 126967 |        |
| cg18650367  | -0.1016524 | 0.09844569 | 2.27E-10 | 37 | 10 | 133909949 | NA          | NA        | NA                    | NA           | NA      | NA          | DMR  | NA   | NA          | NA          | NA           | NA           | 338638 |        |
| cg13583523  | -0.0567286 | 0.0324186  | 2.30E-10 | 37 | 5  | 24764190  | NA          | NA        | NA                    | NA           | NA      | NA          | NA   | TRUE | NA          | NA          | NA           | NA           | 250860 |        |
| cg09646173  | -0.0734968 | 0.06809889 | 2.32E-10 | 37 | 5  | 149317669 | PDE6A       | NM_000440 | Body                  | NA           | NA      | NA          | NA   | NA   | NA          | NA          | NA           | NA           | 184623 |        |
| cg08709672  | 0.06567562 | -0.0557973 | 2.34E-10 | 37 | 1  | 206224334 | AVPR1B;AVP  | NM_000707 | 5'UTR;1stExon         | chr1:206223  | S_Shore | NA          | NA   | NA   | NA          | NA          | NA           | TRUE         | 168291 |        |
| cg19567594  | 0.07378341 | -0.0554543 | 2.34E-10 | 37 | 11 | 10715175  | MRV1;MRV    | NM_001100 | 1stExon;5'UTR;1stExon | NA           | NA      | low-CpG:106 | NA   | TRUE | NA          | NA          | NA           | NA           |        |        |

|            |            |            |          |    |    |           |                   |           |                         |              |         |    |      |      |             |             |              |              |        |        |
|------------|------------|------------|----------|----|----|-----------|-------------------|-----------|-------------------------|--------------|---------|----|------|------|-------------|-------------|--------------|--------------|--------|--------|
| cg17393635 | 0.06615922 | -0.057821  | 2.54E-10 | 37 | 19 | 49843565  | CD37;CD37         | NM_001040 | Body;Body               | chr19:498424 | Island  | NA | NA   | TRUE | 19:54534295 | 19:49843436 | Unclassified | NA           | 318337 |        |
| cg00461022 | 0.05317478 | -0.0680938 | 2.57E-10 | 37 | 5  | 16618052  | FAM134B           | NM_001034 | TSS1500                 | chr5:166165  | S_Shore | NA | NA   | NA   | NA          | NA          | NA           | NA           | 9749   |        |
| cg20952257 | -0.0936782 | 0.11454062 | 2.62E-10 | 37 | 5  | 171074407 | NA                | NA        | NA                      | NA           | NA      | NA | NA   | TRUE | NA          | NA          | NA           | TRUE         | 374486 |        |
| cg11388320 | 0.09969872 | -0.080936  | 2.95E-10 | 37 | 4  | 81119299  | PRDM8;PRDM8       | NM_020226 | 5'UTR;5'UTR             | chr4:811190  | Island  | NA | NA   | NA   | NA          | 4:81338101  | NA           | NA           | NA     | 214344 |
| cg13787850 | -0.1014034 | 0.11549754 | 2.96E-10 | 37 | 9  | 102195951 | NA                | NA        | NA                      | NA           | NA      | NA | NA   | TRUE | NA          | 9:102195826 | Unclassified | TRUE         | 254994 |        |
| cg13378649 | 0.09557518 | -0.0538332 | 2.96E-10 | 37 | 1  | 222927856 | NA                | NA        | NA                      | NA           | NA      | NA | NA   | TRUE | NA          | NA          | NA           | TRUE         | 246463 |        |
| cg02216481 | 0.06073017 | -0.0282395 | 3.00E-10 | 37 | 17 | 7942137   | ALOX15B;ALOX15B   | NM_001039 | TSS1500;TSS1500;TSS1500 | chr22:50919  | S_Shore | NA | NA   | NA   | NA          | NA          | NA           | NA           | NA     | 45254  |
| cg20634227 | 0.05913989 | -0.0372166 | 3.01E-10 | 37 | 22 | 50921009  | ADM2              | NM_024866 | Body                    | chr22:50919  | S_Shore | NA | NA   | TRUE | NA          | 22:50919485 | Unclassified | TRUE         | 369636 |        |
| cg00078456 | 0.07291066 | -0.063025  | 3.13E-10 | 37 | 1  | 1564422   | MIB2;MIB2         | NM_001170 | Body;Body;Body;Body     | chr1:156442  | Island  | NA | NA   | NA   | NA          | NA          | NA           | NA           | NA     | 1809   |
| cg00653615 | 0.03889491 | -0.0315765 | 3.24E-10 | 37 | 1  | 151029327 | CDC42SE1;CDC42SE1 | NM_001038 | 5'UTR;5'UTR             | chr1:151031  | N_Shelf | NA | NA   | NA   | NA          | 1:151028719 | Promoter_A5  | NA           | NA     | 13843  |
| cg08899895 | 0.09042115 | -0.0833377 | 3.25E-10 | 37 | 16 | 85684853  | KIAA0182;KIAA0182 | NM_001134 | Body;Body               | chr16:85684  | S_Shore | NA | NA   | NA   | NA          | 16:84241637 | 16:85684742  | Unclassified | NA     | 171764 |
| cg20164016 | 0.05862226 | -0.0434977 | 3.29E-10 | 37 | 1  | 175474471 | TNR               | NM_003285 | 5'UTR                   | NA           | NA      | NA | NA   | NA   | NA          | 1:173740992 | NA           | NA           | NA     | 362724 |
| cg08305942 | -0.1510063 | 0.15318904 | 3.43E-10 | 37 | 16 | 79692354  | NA                | NA        | NA                      | NA           | NA      | NA | NA   | NA   | NA          | 16:78249855 | NA           | NA           | NA     | 161196 |
| cg05903330 | 0.06335271 | -0.0457774 | 3.49E-10 | 37 | 22 | 39542136  | CBX7              | NM_175709 | Body                    | chr22:39541  | Island  | NA | NA   | NA   | NA          | NA          | NA           | NA           | NA     | 116356 |
| cg04235768 | 0.06223388 | -0.0509208 | 3.53E-10 | 37 | 4  | 81118343  | PRDM8;PRDM8       | NM_001099 | TSS1500;5'UTR           | chr4:811181  | Island  | NA | NA   | NA   | NA          | 4:81336961  | NA           | NA           | NA     | 85109  |
| cg01801603 | 0.06188492 | -0.0668734 | 3.59E-10 | 37 | 8  | 123795433 | ZHX2              | NM_014943 | 5'UTR                   | chr8:123792  | S_Shore | NA | NA   | CDMR | NA          | 8:123795401 | Promoter_A5  | NA           | NA     | 36897  |
| cg23235965 | 0.07796882 | -0.0504498 | 3.68E-10 | 37 | 6  | 30459540  | HLA-E             | NM_005516 | Body                    | chr6:304573  | S_Shore | NA | NA   | NA   | NA          | NA          | NA           | NA           | NA     | 409607 |
| cg08214927 | 0.05391722 | -0.0408764 | 3.76E-10 | 37 | 14 | 91765824  | CDC8C8C           | NM_001080 | Body                    | NA           | NA      | NA | NA   | NA   | NA          | 14:90835527 | NA           | NA           | NA     | 159428 |
| cg12590902 | 0.08251349 | -0.074558  | 3.86E-10 | 37 | 1  | 44771985  | ERI3              | NM_024066 | Body                    | NA           | NA      | NA | NA   | NA   | NA          | 1:44771813  | Gene_Assoc   | NA           | NA     | 234120 |
| cg15095906 | 0.05636926 | -0.0350701 | 3.94E-10 | 37 | 1  | 36789786  | FAM176B           | NM_018166 | TSS200                  | chr1:367865  | S_Shore | NA | NA   | NA   | NA          | NA          | NA           | NA           | NA     | 280311 |
| cg23025459 | 0.09559568 | -0.0844054 | 3.96E-10 | 37 | 1  | 3134420   | PRDM16;PRDM16     | NM_022114 | Body;Body               | NA           | NA      | NA | NA   | NA   | NA          | 1:3123982-3 | NA           | NA           | NA     | 406028 |
| cg04523868 | 0.05117195 | -0.0219784 | 4.07E-10 | 37 | 11 | 64563983  | MAP4K2            | NM_004579 | Body                    | NA           | NA      | NA | NA   | NA   | NA          | NA          | NA           | NA           | NA     | 90636  |
| cg24448421 | 0.06634623 | -0.0583897 | 4.44E-10 | 37 | 12 | 68737061  | NA                | NA        | NA                      | NA           | NA      | NA | NA   | TRUE | NA          | NA          | NA           | NA           | NA     | 429128 |
| cg04604946 | 0.04296207 | -0.035712  | 4.46E-10 | 37 | 12 | 7023352   | LRRC23;ENO1       | NM_201650 | 3'UTR;TSS1500;3'UTR     | chr12:70232  | Island  | NA | CDMR | NA   | NA          | 12:6893563  | 12:7023192   | Promoter_A5  | NA     | 92204  |
| cg02676175 | 0.15120902 | -0.1218661 | 4.67E-10 | 37 | 17 | 7253720   | KCTD11;ACA        | NM_001002 | TSS1500;Body            | chr17:72532  | Island  | NA | NA   | NA   | NA          | 17:7194023  | 17:7253029   | Promoter_A5  | NA     | 54546  |
| cg10239319 | 0.07074185 | -0.0542302 | 4.79E-10 | 37 | 4  | 6073656   | JAKMIP1;JAKMIP1   | NM_144720 | Body;Body               | NA           | NA      | NA | NA   | NA   | TRUE        | NA          | NA           | NA           | NA     | 195028 |
| cg08003402 | -0.0730903 | 0.09849133 | 4.99E-10 | 37 | 3  | 15311021  | SH3BP5;SH3BP5     | NM_001018 | Body;Body               | NA           | NA      | NA | NA   | NA   | TRUE        | NA          | 3:15310982   | Promoter_A5  | TRUE   | 155473 |
| cg06490845 | 0.05142717 | -0.0413866 | 5.19E-10 | 37 | 16 | 88858315  | NA                | NA        | NA                      | NA           | NA      | NA | NA   | TRUE | NA          | 16:87385690 | 16:88857645  | Unclassified | NA     | 126653 |
| cg26337070 | 0.10010255 | -0.0635744 | 5.40E-10 | 37 | 2  | 85999873  | ATOH8             | NM_032827 | Body                    | NA           | NA      | NA | NA   | TRUE | NA          | 2:85852898  | NA           | NA           | NA     | 459577 |
| cg01748892 | 0.06801249 | -0.049836  | 5.44E-10 | 37 | 7  | 27184667  | HOKA5             | NM_019102 | TSS1500                 | chr7:271826  | Island  | NA | NA   | NA   | NA          | 7:27150952  | NA           | NA           | NA     | 35782  |
| cg16846518 | -0.0965343 | 0.11777727 | 5.53E-10 | 37 | 3  | 128062608 | EEFSEC            | NM_021937 | Body                    | NA           | NA      | NA | NA   | TRUE | NA          | NA          | NA           | NA           | TRUE   | 309525 |
| cg06753439 | 0.07337427 | -0.0567643 | 5.77E-10 | 37 | 6  | 33245488  | B3GALT4           | NM_003782 | 1stExon                 | chr6:332446  | Island  | NA | NA   | TRUE | NA          | 6:33352687  | 6:33244505   | Promoter_A5  | TRUE   | 131658 |
| cg27106909 | 0.06517408 | -0.0621124 | 5.95E-10 | 37 | 16 | 30106897  | YPEL3;YPEL3       | NM_031477 | 1stExon;5'UTR;5'UTR     | chr16:30107  | N_Shore | NA | NA   | TRUE | NA          | 16:30014183 | 16:30106816  | Promoter_A5  | NA     | 472978 |
| cg24124954 | 0.06580839 | -0.0586379 | 6.01E-10 | 37 | 6  | 31508106  | BAT1;BAT1         | NM_080598 | Body;Body               | chr6:315096  | N_Shore | NA | RDMR | NA   | NA          | NA          | NA           | NA           | NA     | 424083 |
| cg00138407 | 0.06086783 | -0.0377876 | 6.07E-10 | 37 | 3  | 47386505  | KHL18             | NM_025010 | 3'UTR                   | NA           | NA      | NA | NA   | NA   | NA          | NA          | NA           | NA           | NA     | 3124   |
| cg18563886 | -0.0669786 | 0.03932684 | 6.13E-10 | 37 | 10 | 135203102 | PAOX;PAOX         | NM_207128 | Body;Body;3'UTR         | chr10:13520  | Island  | NA | NA   | NA   | NA          | 10:13505305 | 10:13520226  | Promoter_A5  | NA     | 337268 |
| cg22294740 | 0.11608971 | -0.1060699 | 6.22E-10 | 37 | 19 | 2294961   | LINGO3            | NM_001101 | 5'UTR                   | chr19:22948  | Island  | NA | NA   | NA   | NA          | 19:2245859  | NA           | NA           | TRUE   | 394727 |
| cg11360522 | 0.04046835 | -0.0314505 | 6.28E-10 | 37 | 13 | 113379828 | ATP11A;ATP11A     | NM_015205 | Body;Body               | chr13:11338  | N_Shelf | NA | NA   | TRUE | NA          | 13:11337957 | Unclassified | TRUE         | 213891 |        |
| cg11419304 | -0.0528252 | 0.0417601  | 6.32E-10 | 37 | 2  | 69248344  | ANTXR1;ANTXR1     | NM_053034 | Body;Body;Body          | NA           | NA      | NA | NA   | TRUE | NA          | NA          | NA           | NA           | NA     | 214916 |
| cg26860970 | 0.05450371 | -0.0300656 | 6.41E-10 | 37 | 6  | 30881658  | VAR5;VAR5         | NM_001167 | TSS1500;TSS1500;TSS1500 | chr6:308815  | Island  | NA | NA   | NA   | NA          | 6:30989539  | 6:30881429   | Promoter_A5  | NA     | 468676 |
| cg24247537 | 0.13287357 | -0.1149803 | 6.51E-10 | 37 | 11 | 457278    | PTDS2             | NM_030783 | Body                    | chr11:45908  | N_Shore | NA | NA   | NA   | NA          | 11:447256-4 | 11:456465-4  | Unclassified | NA     | 426002 |
| cg06373870 | 0.08095944 | -0.0702853 | 7.04E-10 | 37 | 4  | 81117853  | PRDM8;PRDM8       | NM_001099 | TSS1500;5'UTR           | chr4:811181  | N_Shore | NA | RDMR | TRUE | NA          | 4:81336689  | 4:81117576   | Unclassified | NA     | 124647 |
| cg03796381 | -0.0504546 | 0.04891006 | 7.10E-10 | 37 | 15 | 36650033  | NA                | NA        | NA                      | NA           | NA      | NA | NA   | TRUE | NA          | NA          | NA           | NA           | NA     | 76648  |
| cg26161820 | 0.06288561 | -0.036605  | 7.33E-10 | 37 | 17 | 37792777  | STARD3;PPP        | NM_006804 | TSS1500;3'UTR;3'UTR     | chr17:37793  | N_Shore | NA | NA   | NA   | NA          | 17:37792752 | Promoter_A5  | NA           | NA     | 456520 |
| cg05677712 | 0.05565654 | -0.0387345 | 7.60E-10 | 37 | 3  | 195586796 | NA                | NA        | NA                      | NA           | NA      | NA | NA   | TRUE | NA          | 3:197071193 | 3:195585913  | Unclassified | NA     | 112351 |
| cg23663547 | 0.04323491 | -0.0359425 | 7.61E-10 | 37 | 17 | 38710320  | CCR7              | NM_001838 | 3'UTR                   | NA           | NA      | NA | NA   | NA   | NA          | NA          | NA           | NA           | NA     | 416535 |
| cg26311932 | 0.04150237 | -0.038546  | 7.73E-10 | 37 | 6  | 31549563  | LTB;LTB           | NM_002341 | Body;Body               | chr6:315484  | S_Shore | NA | NA   | NA   | NA          | 6:31547692  | Promoter_A5  | NA           | NA     | 459115 |
| cg05452645 | 0.08853253 | -0.0757539 | 7.91E-10 | 37 | 4  | 81117647  | PRDM8;PRDM8       | NM_001099 | TSS1500;5'UTR           | chr4:811181  | N_Shore | NA | CDMR | TRUE | NA          | 4:81117576  | Unclassified | NA           | NA     | 108260 |
| cg24844545 | 0.04061719 | -0.0367783 | 8.04E-10 | 37 | 1  | 11908347  | NPPA              | NM_006172 | TSS1500                 | NA           | NA      | NA | NA   | TRUE | NA          | NA          | NA           | NA           | NA     | 435746 |
| cg11701868 | 0.13723796 | -0.1467899 | 8.24E-10 | 37 | 19 | 4912006   | UHRF1;UHRF1       | NM_013282 | Body;Body               | chr19:49092  | S_Shore | NA | RDMR | TRUE | NA          | 19:4862547  | 19:4911827   | Promoter_A5  | NA     | 219334 |
| cg13518625 | -0.0964697 | 0.09052739 | 8.31E-10 | 37 | 8  | 29522838  | NA                | NA        | NA                      | NA           | NA      | NA | NA   | TRUE | NA          | 8:29522663  | Unclassified | TRUE         | NA     | 249424 |
| cg08098420 | -0.0554733 | 0.03707919 | 8.67E-10 | 37 | 16 | 66164601  | NA                | NA        | NA                      | NA           | NA      | NA | NA   | TRUE | NA          | NA          | NA           | NA           | NA     | 157150 |
| cg17397159 | 0.05273706 | -0.0397499 | 9.19E-10 | 37 | 4  | 720144    | PCGF3             | NM_006315 | 5'UTR                   | chr4:716281  | S_Shelf | NA | NA   | TRUE | NA          | 4:710112-71 | NA           | NA           | TRUE   | 318387 |
| cg19882268 | 0.02963004 | -0.0219997 | 9.46E-10 | 37 | 6  | 33245779  | B3GALT4           | NM_003782 | 1stExon                 | chr6:332446  | S_Shore | NA | NA   | TRUE | NA          | 6:33352687  | 6:33244505   | Promoter_A5  | NA     | 358254 |
| cg11093760 | 0.06682421 | -0.0510033 | 9.58E-10 | 37 | 15 | 65503807  | CLP;CLP           | NM_003613 | 5'UTR;1stExon           | NA           | NA      | NA | NA   | TRUE | NA          | 15:65503680 | Unclassified | NA           | NA     | 209433 |
| cg06457011 | 0.12470172 | -0.1355739 | 9.81E-10 | 37 | 20 | 39767490  | PLCG1;PLCG1       | NM_002660 | Body;Body               | chr20:39765  | S_Shore | NA | RDMR | NA   | NA          | NA          | NA           | NA           | NA     | 126055 |
| cg16736826 | -0.0734139 | 0.07177178 | 9.85E-10 | 37 | 1  | 41951512  | EDN2              | NM_001956 | TSS1500                 | NA           | NA      | NA | NA   | TRUE | NA          | NA          | NA           | TRUE         | NA     | 307826 |
| cg02988947 | 0.05147799 | -0.0581462 | 9.92E-10 | 37 | 17 | 61778813  | UMD2              | NM_030576 | TSS1500                 | chr17:61776  | S_Shore | NA | NA   | NA   | NA          | NA          | NA           | NA           | NA     | 60891  |
| cg07338715 | 0.04996369 | -0.0343941 | 1.01E-09 | 37 | 2  | 109649281 | NA                | NA        | NA                      | chr2:109647  | S_Shore | NA | RDMR | NA   | NA          | NA          | NA           | NA           | NA     | 143354 |
| cg01542019 | 0.07589654 | -0.0711544 | 1.05E-09 | 37 | 19 | 14673053  | TECR              | NM_138501 | Body                    | chr19:14676  | N_Shelf | NA | NA   | TRUE | NA          | NA          | NA           | NA           | TRUE   | 31904  |
| cg18791929 | 0.0850778  | -0.0372719 | 1.08E-09 | 37 | 3  | 108205828 | MYH15             | NM_014981 | Body                    | NA           | NA      | NA | NA   | TRUE | NA          | NA          | NA           | NA           | NA     | 340884 |
| cg02721693 | -0.1025369 | 0.10374688 | 1.12E-09 | 37 | 1  | 182       |                   |           |                         |              |         |    |      |      |             |             |              |              |        |        |

|            |            |             |          |    |    |           |               |           |                          |             |         |             |      |      |             |             |              |              |        |        |
|------------|------------|-------------|----------|----|----|-----------|---------------|-----------|--------------------------|-------------|---------|-------------|------|------|-------------|-------------|--------------|--------------|--------|--------|
| cg16641055 | 0.06012661 | -0.055457   | 1.19E-09 | 37 | 16 | 88846292  | FAM38A        | NM_001142 | Body                     | chr16:88844 | S_Shore | NA          | NA   | TRUE | 16:87373719 | NA          | NA           | NA           | 305973 |        |
| cg02452500 | 0.05062005 | -0.0381071  | 1.27E-09 | 37 | 11 | 13161927  | NA            | NA        | NA                       | NA          | NA      | NA          | NA   | TRUE | NA          | 11:13161852 | Unclassified | NA           | 49921  |        |
| cg01894038 | 0.0959704  | -0.0563284  | 1.29E-09 | 37 | 11 | 77741873  | NA            | NA        | NA                       | NA          | NA      | NA          | NA   | TRUE | NA          | NA          | NA           | TRUE         | 38806  |        |
| cg02619205 | 0.04354103 | -0.0171192  | 1.30E-09 | 37 | 9  | 117157157 | AKNA          | NM_030767 | TSS1500                  | chr9:117160 | N_Shelf | NA          | NA   | NA   | NA          | NA          | NA           | NA           | 53341  |        |
| cg06997114 | 0.05652462 | -0.0300543  | 1.30E-09 | 37 | 18 | 21851455  | OSBP1A;OS     | NM_080597 | Body;5'UTR               | chr18:21851 | Island  | NA          | NA   | NA   | NA          | 18:20105359 | NA           | NA           | 136654 |        |
| cg14997707 | -0.0711956 | -0.05866743 | 1.31E-09 | 37 | 7  | 93853120  | NA            | NA        | NA                       | NA          | NA      | NA          | NA   | TRUE | NA          | 7:93852772  | Unclassified | NA           | 278636 |        |
| cg04247152 | 0.16103474 | -0.1125961  | 1.34E-09 | 37 | 16 | 88590325  | ZFPM1         | NM_153813 | Body                     | chr16:88590 | Island  | NA          | NA   | NA   | NA          | 16:87117783 | NA           | NA           | 85335  |        |
| cg18877271 | 0.09671561 | -0.071109   | 1.35E-09 | 37 | 11 | 1952638   | TNNT3;TNNT    | NM_001042 | Body;Body;Body;Body      | chr11:19503 | S_Shore | NA          | NA   | NA   | NA          | 11:1909189  | NA           | NA           | 342316 |        |
| cg19358373 | 0.04979743 | -0.0318218  | 1.42E-09 | 37 | 12 | 133414571 | NA            | NA        | NA                       | chr12:13341 | S_Shore | NA          | NA   | NA   | NA          | NA          | NA           | NA           | 349347 |        |
| cg23090529 | -0.0892371 | 0.06482845  | 1.42E-09 | 37 | 1  | 51442133  | NA            | NA        | NA                       | chr1:514433 | N_Shore | NA          | RDMR | NA   | NA          | NA          | NA           | NA           | 407226 |        |
| cg24046155 | 0.06012701 | -0.0460398  | 1.43E-09 | 37 | 19 | 2294369   | LINGO3        | NM_001101 | 5'UTR                    | chr19:22948 | N_Shore | NA          | DMR  | NA   | NA          | 19:2245323  | NA           | TRUE         | 422764 |        |
| cg18702971 | 0.0578824  | -0.0346072  | 1.48E-09 | 37 | 22 | 29920546  | THOC5;THOC    | NM_001002 | Body;Body;Body;Body      | NA          | NA      | NA          | NA   | NA   | NA          | 22:29920492 | Gene_Assoc   | NA           | 339381 |        |
| cg09415366 | -0.0637739 | 0.06011528  | 1.52E-09 | 37 | 10 | 134385407 | INPP5A        | NM_005539 | Body                     | NA          | NA      | NA          | NA   | TRUE | NA          | 10:13438523 | Promoter_A3  | TRUE         | 180609 |        |
| cg07377178 | 0.05188967 | -0.00291586 | 1.54E-09 | 37 | 6  | 3025064   | NA            | NA        | NA                       | NA          | NA      | NA          | NA   | TRUE | NA          | NA          | NA           | TRUE         | 144046 |        |
| cg26038649 | 0.0502514  | -0.0436061  | 1.62E-09 | 37 | 1  | 27683501  | MAP3K6        | NM_004672 | Body                     | chr1:276832 | Island  | NA          | NA   | NA   | NA          | 1:27555571  | 1:27683199   | Promoter_A3  | NA     | 454404 |
| cg25021247 | 0.0644312  | -0.0463637  | 1.83E-09 | 37 | 3  | 49460162  | AMT;AMT;AMT   | NR_028435 | TSS200;TSS200;TSS200     | NA          | NA      | NA          | NA   | TRUE | NA          | NA          | NA           | NA           | 438717 |        |
| cg23507953 | 0.05118097 | -0.0407976  | 1.83E-09 | 37 | 17 | 46638127  | HOXB3         | NM_002146 | 5'UTR                    | chr17:46641 | N_Shelf | NA          | NA   | TRUE | NA          | 17:46638064 | Unclassified | NA           | 414032 |        |
| cg03710029 | 0.04862849 | -0.0578517  | 1.84E-09 | 37 | 17 | 79265601  | SLC38A10;SLC  | NM_001037 | Body;Body                | chr17:79268 | N_Shelf | NA          | NA   | NA   | NA          | 17:79265286 | Unclassified | TRUE         | 74932  |        |
| cg22907189 | 0.04726384 | -0.0304176  | 1.85E-09 | 37 | 5  | 172430563 | ATP6V0E1      | NM_003945 | Body                     | NA          | NA      | NA          | NA   | TRUE | NA          | NA          | NA           | NA           | 404092 |        |
| cg24807889 | -0.0716148 | 0.06770569  | 1.99E-09 | 37 | 1  | 1135955   | NA            | NA        | NA                       | chr1:113636 | N_Shore | NA          | NA   | NA   | NA          | 1:1135946   | 1            | Unclassified | NA     | 435187 |
| cg06744585 | 0.09628312 | -0.0948994  | 2.11E-09 | 37 | 19 | 13135808  | NFIX          | NM_002501 | Body                     | chr19:13135 | Island  | low-CpG:129 | NA   | NA   | NA          | 19:12996280 | NA           | NA           | NA     | 131467 |
| cg15052747 | 0.03989975 | -0.0242502  | 2.23E-09 | 37 | 9  | 138942591 | NAC22         | NM_144653 | 5'UTR                    | chr9:138941 | Island  | NA          | NA   | NA   | NA          | 9:138081292 | NA           | NA           | NA     | 279546 |
| cg13790576 | -0.0704896 | 0.05999753  | 2.23E-09 | 37 | 9  | 139640661 | LCN6          | NM_198946 | Body                     | chr9:139640 | Island  | NA          | NA   | NA   | NA          | 9:138760319 | NA           | TRUE         | 255056 |        |
| cg09446583 | 0.04537937 | -0.0327836  | 2.23E-09 | 37 | 2  | 43398271  | NA            | NA        | NA                       | chr2:433980 | Island  | NA          | NA   | NA   | NA          | 2:43398234  | Unclassified | NA           | 181175 |        |
| cg25921609 | 0.14418809 | -0.1315192  | 2.27E-09 | 37 | 17 | 8379225   | MYH10         | NM_005964 | Body                     | chr17:83801 | N_Shore | NA          | NA   | NA   | NA          | 17:8319758  | NA           | NA           | NA     | 452437 |
| cg18828619 | 0.05463468 | -0.0331459  | 2.27E-09 | 37 | 14 | 56615077  | PEL12         | NM_021255 | Body                     | NA          | NA      | NA          | NA   | TRUE | NA          | NA          | NA           | NA           | 341522 |        |
| cg11993160 | -0.0856717 | 0.10457698  | 2.28E-09 | 37 | 18 | 12404041  | NA            | NA        | NA                       | chr18:12407 | N_Shelf | NA          | NA   | NA   | NA          | NA          | NA           | TRUE         | 224500 |        |
| cg17400113 | 0.05522684 | -0.0361756  | 2.48E-09 | 37 | 15 | 93617146  | RGMA;RGM      | NM_001166 | 1stExon;TSS1500;Body     | chr15:93615 | Island  | NA          | NA   | NA   | NA          | 15:91416627 | 15:93616879  | Unclassified | NA     | 318434 |
| cg06776173 | 0.05309359 | -0.0313895  | 2.50E-09 | 37 | 1  | 46932780  | NA            | NA        | NA                       | chr1:469321 | Island  | NA          | NA   | TRUE | 1:46704650  | 1:46931908  | Unclassified | TRUE         | 132148 |        |
| cg24217948 | -0.0553408 | 0.05662125  | 2.50E-09 | 37 | 18 | 42261980  | SETBP1;SETB   | NM_001130 | 5'UTR;5'UTR              | chr18:42258 | S_Shore | NA          | RDMR | TRUE | NA          | NA          | NA           | NA           | 425640 |        |
| cg07925670 | 0.11168457 | -0.0855865  | 2.58E-09 | 37 | 17 | 7253489   | ACAP1         | NM_014716 | Body                     | chr17:72532 | Island  | NA          | NA   | NA   | NA          | 17:7194023  | 17:7253029   | Promoter_A3  | NA     | 154106 |
| cg13430552 | 0.05503353 | -0.0534975  | 2.71E-09 | 37 | 2  | 25427652  | NA            | NA        | NA                       | chr2:254271 | S_Shore | NA          | NA   | NA   | NA          | 2:25427162  | Unclassified | NA           | 247495 |        |
| cg05915362 | -0.0662653 | 0.07331545  | 2.72E-09 | 37 | 6  | 159274480 | OSTCL         | NR_028496 | Body                     | NA          | NA      | NA          | NA   | TRUE | NA          | 6:159274295 | Promoter_A3  | TRUE         | 116567 |        |
| cg08750510 | -0.0885488 | 0.06223902  | 2.82E-09 | 37 | 5  | 32537617  | NA            | NA        | NA                       | NA          | NA      | NA          | NA   | TRUE | NA          | NA          | NA           | NA           | 169007 |        |
| cg01368217 | 0.05950369 | -0.037131   | 2.83E-09 | 37 | 10 | 127836603 | ADAM12;AD     | NM_003474 | Body;Body                | NA          | NA      | NA          | NA   | TRUE | NA          | NA          | NA           | NA           | 28439  |        |
| cg19880597 | 0.0727124  | -0.0485752  | 2.83E-09 | 37 | 5  | 136965606 | KLHL3         | NM_017415 | Body                     | NA          | NA      | NA          | NA   | TRUE | NA          | 5:136964818 | Unclassified | TRUE         | 358223 |        |
| cg24556382 | -0.1022536 | 0.10903367  | 2.86E-09 | 37 | 4  | 174173455 | GALNT7        | NM_017423 | Body                     | NA          | NA      | NA          | NA   | TRUE | NA          | NA          | NA           | TRUE         | 430977 |        |
| cg03131366 | 0.05921835 | -0.0350475  | 2.90E-09 | 37 | 12 | 2041707   | NA            | NA        | NA                       | NA          | NA      | NA          | NA   | NA   | NA          | 12:1911668  | NA           | NA           | NA     | 63637  |
| cg23732024 | -0.0864421 | 0.06946106  | 2.94E-09 | 37 | 8  | 74903801  | LY96          | NM_015364 | Body                     | NA          | NA      | NA          | NA   | TRUE | NA          | NA          | NA           | NA           | 417774 |        |
| cg08818610 | 0.10921114 | -0.0978156  | 2.98E-09 | 37 | 6  | 24910720  | FAM65B        | NM_014722 | 5'UTR                    | chr6:249106 | Island  | NA          | DMR  | NA   | NA          | 6:25018606  | NA           | NA           | NA     | 170119 |
| cg00984696 | -0.0531038 | 0.03971466  | 2.98E-09 | 37 | 3  | 124128381 | KALRN;KALR    | NM_001024 | Body;Body                | NA          | NA      | NA          | NA   | TRUE | NA          | NA          | NA           | NA           | 20709  |        |
| cg22539182 | 0.07203306 | -0.0508217  | 3.04E-09 | 37 | 10 | 850393    | NA            | NA        | NA                       | chr10:85110 | N_Shore | NA          | NA   | TRUE | NA          | 10:850372   | 8            | Unclassified | NA     | 398228 |
| cg06812840 | 0.05117399 | -0.0427015  | 3.18E-09 | 37 | 17 | 7492524   | SOX15         | NM_006942 | 1stExon                  | chr17:74923 | Island  | NA          | NA   | NA   | NA          | 17:7432995  | 17:7491270   | Unclassified | NA     | 132905 |
| cg07677157 | -0.1504338 | 0.14515999  | 3.19E-09 | 37 | 12 | 66050928  | NA            | NA        | NA                       | NA          | NA      | NA          | NA   | TRUE | NA          | NA          | NA           | TRUE         | 149585 |        |
| cg02116864 | 0.06899252 | -0.0663761  | 3.19E-09 | 37 | 10 | 134222453 | PWWP2B;PWW    | NM_138499 | 3'UTR;Body               | chr10:13421 | S_Shelf | NA          | NA   | NA   | NA          | 10:13407240 | NA           | NA           | NA     | 43449  |
| cg16014606 | 0.08355164 | -0.0746775  | 3.26E-09 | 37 | 11 | 10715221  | MRV1;MRV      | NM_001100 | 1stExon;5'UTR;1stExon    | NA          | NA      | low-CpG:106 | NA   | TRUE | NA          | NA          | NA           | NA           | 295011 |        |
| cg03165356 | -0.1040054 | 0.13240956  | 3.30E-09 | 37 | 2  | 216882347 | NA            | NA        | NA                       | chr2:216877 | S_Shelf | NA          | NA   | NA   | NA          | 2:216882322 | Unclassified | TRUE         | 64300  |        |
| cg21535931 | -0.1132368 | 0.12548705  | 3.33E-09 | 37 | 8  | 145029603 | PLEC1;PLEC1   | NM_000445 | Body;Body                | chr8:145027 | S_Shore | NA          | NA   | TRUE | NA          | NA          | NA           | NA           | 383457 |        |
| cg13553455 | -0.0586393 | 0.05135254  | 3.35E-09 | 37 | 10 | 105846002 | COL17A1       | NM_000494 | TSS1500                  | NA          | NA      | NA          | NA   | NA   | NA          | NA          | NA           | NA           | 250145 |        |
| cg17344906 | 0.08840699 | -0.0919413  | 3.48E-09 | 37 | 19 | 13202507  | NFIX          | NM_002501 | 3'UTR                    | chr19:13198 | S_Shelf | NA          | NA   | NA   | NA          | 19:13202502 | Unclassified | NA           | 317563 |        |
| cg04115307 | -0.1252777 | 0.11375227  | 3.54E-09 | 37 | 14 | 101539612 | NA            | NA        | NA                       | NA          | NA      | NA          | NA   | TRUE | NA          | 14:10060911 | NA           | NA           | 82665  |        |
| cg01791634 | 0.06719586 | -0.082857   | 3.57E-09 | 37 | 17 | 76130139  | TMC8          | NM_152468 | Body                     | chr17:76127 | S_Shore | NA          | NA   | NA   | NA          | 17:73641728 | 17:76129950  | Promoter_A3  | NA     | 36675  |
| cg27646484 | 0.06318651 | -0.0475134  | 3.61E-09 | 37 | 16 | 31210736  | NA            | NA        | NA                       | chr16:31213 | N_Shelf | NA          | NA   | NA   | NA          | NA          | NA           | NA           | 482082 |        |
| cg04219321 | 0.03540909 | -0.0240342  | 3.77E-09 | 37 | 17 | 53341659  | HLF           | NM_002126 | TSS1500                  | chr17:53342 | N_Shore | NA          | NA   | NA   | NA          | 17:50696658 | 17:53341444  | Unclassified | NA     | 84757  |
| cg27164770 | -0.1183044 | 0.10353926  | 3.78E-09 | 37 | 13 | 94891445  | GPC6          | NM_005708 | Body                     | NA          | NA      | NA          | NA   | TRUE | NA          | NA          | NA           | NA           | 473950 |        |
| cg14548802 | 0.11914115 | -0.121633   | 3.93E-09 | 37 | 9  | 137675380 | COL5A1        | NM_000093 | Body                     | NA          | NA      | NA          | NA   | NA   | NA          | 9:136814982 | NA           | NA           | NA     | 270731 |
| cg16300030 | 0.0385706  | -0.0338626  | 4.07E-09 | 37 | 6  | 32908980  | HLA-DMB       | NM_002118 | TSS200                   | NA          | NA      | NA          | NA   | TRUE | NA          | 6:32908496  | Unclassified | TRUE         | 299736 |        |
| cg22670759 | 0.05701029 | -0.0354436  | 4.09E-09 | 37 | 3  | 50487955  | CACNA2D2;C    | NM_001005 | Body;Body                | NA          | NA      | NA          | NA   | NA   | NA          | 3:50462908  | 3:50487465   | Unclassified | NA     | 400108 |
| cg13707760 | 0.06002815 | -0.0453274  | 4.14E-09 | 37 | 9  | 95986383  | WNK2          | NM_006648 | Body                     | NA          | NA      | NA          | NA   | TRUE | NA          | NA          | NA           | TRUE         | 253438 |        |
| cg07807757 | -0.1413563 | 0.17301198  | 4.14E-09 | 37 | 7  | 50894570  | NA            | NA        | NA                       | NA          | NA      | NA          | NA   | TRUE | NA          | NA          | NA           | TRUE         | 151952 |        |
| cg17917325 | 0.04703427 | -0.0321066  | 4.30E-09 | 37 | 7  | 56142347  | SUMF2;SUM     | NM_001042 | Body;Body;Body;Body;Body | NA          | NA      | NA          | NA   | NA   | NA          | 7:56109650  | 7:56141833   | Gene_Assoc   | TRUE   | 326396 |
| cg12810800 | -0.1287553 | 0.10763551  | 4.34E-09 | 37 | 2  | 159788345 | NA            | NA        | NA                       | NA          | NA      | NA          | NA   | TRUE | NA          | NA          | NA           | NA           | 237631 |        |
| cg17640485 | 0.07834648 | -0.0573388  | 4.44E-09 | 37 | 3  | 195620147 | TNK2;TNK2     | NM_001010 | Body;5'UTR               | chr3:195622 | N_Shelf | NA          | NA   | TRUE | NA          | NA          | NA           | TRUE         | 322158 |        |
| cg20603222 | 0.05211114 | -0.0353998  | 4.68E-09 | 37 | 7  | 1096387   | C7orf50;C7orf | NM_001134 | Body;Body;TSS1500;Body   | chr7:       |         |             |      |      |             |             |              |              |        |        |

|            |            |            |          |    |    |           |             |           |                       |             |         |             |      |      |             |             |              |              |        |        |        |
|------------|------------|------------|----------|----|----|-----------|-------------|-----------|-----------------------|-------------|---------|-------------|------|------|-------------|-------------|--------------|--------------|--------|--------|--------|
| cg14172849 | 0.10051824 | -0.0857924 | 5.13E-09 | 37 | 14 | 104171259 | XRCC3;XRCC3 | NM_001100 | Body;Body;Body        | NA          | NA      | NA          | NA   | NA   | NA          | 14:10324099 | NA           | NA           | NA     | 262966 |        |
| cg12076102 | 0.05681506 | -0.0411709 | 5.21E-09 | 37 | 17 | 62084322  | ICAM2;ICAM  | NM_001099 | 5'UTR;5'UTR;5'UTR;5'  | NA          | NA      | low-CpG-594 | NA   | NA   | NA          | NA          | NA           | NA           | NA     | 225917 |        |
| cg03957124 | -0.0828969 | 0.06629897 | 5.43E-09 | 37 | 6  | 37016869  | NA          | NA        | NA                    | chr6:370126 | S_Shelf | NA          | NA   | NA   | NA          | NA          | 6:37016466   | Unclassified | TRUE   | 79573  |        |
| cg23786580 | 0.04971349 | -0.0365113 | 5.47E-09 | 37 | 7  | 43204506  | HECW1       | NM_015052 | 5'UTR                 | NA          | NA      | NA          | NA   | TRUE | NA          | NA          | 7:43204379   | Unclassified | TRUE   | 418444 |        |
| cg26361757 | 0.06026312 | -0.0562464 | 5.53E-09 | 37 | 1  | 6706713   | DNAJC11     | NM_018198 | Body                  | NA          | NA      | NA          | NA   | NA   | NA          | NA          | 1:6706534-6  | Gene_Assoc   | TRUE   | 460066 |        |
| cg26460530 | 0.06919797 | -0.0738581 | 5.71E-09 | 37 | 22 | 39919067  | NA          | NA        | NA                    | chr22:39915 | S_Shore | NA          | RDMR | NA   | NA          | NA          | 22:39918759  | Promoter_A3  | TRUE   | 461690 |        |
| cg11405655 | -0.045993  | 0.04647479 | 5.73E-09 | 37 | 1  | 999599    | NA          | NA        | NA                    | chr1:999678 | N_Shore | NA          | NA   | NA   | NA          | 1:989344-98 | 1:998374-10  | NonGene_A3   | NA     | 214644 |        |
| cg13257654 | 0.05597175 | -0.0429682 | 5.80E-09 | 37 | 8  | 42946331  | NA          | NA        | NA                    | chr8:429485 | N_Shelf | NA          | NA   | NA   | NA          | NA          | NA           | NA           | NA     | 244418 |        |
| cg08462055 | 0.07828803 | -0.0793558 | 5.91E-09 | 37 | 15 | 64944023  | ZNF609      | NM_015042 | Body                  | NA          | NA      | NA          | NA   | TRUE | NA          | NA          | 15:64943717  | Unclassified | NA     | 163859 |        |
| cg10471113 | 0.09811383 | -0.1240005 | 6.07E-09 | 37 | 16 | 1587842   | IFT140;TME  | NM_014714 | Body;Body             | chr16:15876 | Island  | NA          | NA   | NA   | NA          | 16:1527106- | 16:1587536-  | Unclassified | NA     | 198896 |        |
| cg11699257 | 0.06201257 | -0.0243415 | 6.08E-09 | 37 | 8  | 28634455  | INTS9;INTS9 | NM_018250 | Body;Body;Body        | NA          | NA      | NA          | NA   | TRUE | NA          | NA          | 8:28634408-  | Unclassified | NA     | 219285 |        |
| cg00257455 | 0.05022148 | -0.0472203 | 6.33E-09 | 37 | 1  | 65530538  | NA          | NA        | NA                    | chr1:655321 | N_Shore | NA          | NA   | NA   | NA          | NA          | NA           | NA           | NA     | 5520   |        |
| cg03746015 | -0.1396052 | 0.14795275 | 6.35E-09 | 37 | 16 | 11141000  | CLEC16A     | NM_015226 | Body                  | NA          | NA      | NA          | NA   | TRUE | NA          | NA          | NA           | NA           | NA     | 75694  |        |
| cg01899318 | -0.087252  | 0.07797957 | 6.36E-09 | 37 | 16 | 71523395  | ZNF19       | NM_006961 | TSS200                | NA          | NA      | NA          | NA   | NA   | NA          | 16:70080707 | NA           | NA           | NA     | 38899  |        |
| cg01751802 | 0.0678551  | -0.0673118 | 6.59E-09 | 37 | 19 | 11309639  | KANK2       | NM_001136 | TSS1500               | chr19:11307 | S_Shore | NA          | NA   | NA   | NA          | NA          | NA           | NA           | NA     | 35846  |        |
| cg12559228 | -0.09488   | 0.09057805 | 6.59E-09 | 37 | 19 | 50191882  | C19orf76    | NM_001101 | TSS200                | chr19:50192 | N_Shore | NA          | NA   | NA   | TRUE        | NA          | NA           | NA           | NA     | 233594 |        |
| cg09152259 | -0.0533324 | 0.075097   | 6.62E-09 | 37 | 2  | 128156114 | NA          | NA        | NA                    | chr2:128158 | N_Shelf | NA          | NA   | NA   | NA          | NA          | 2:128155907  | Unclassified | NA     | 175977 |        |
| cg26077811 | -0.1124513 | 0.08902712 | 6.94E-09 | 37 | 11 | 119232263 | USP2;USP2   | NM_004205 | Body;Body             | chr11:11923 | N_Shelf | NA          | NA   | NA   | NA          | NA          | 11:11923223  | Unclassified | TRUE   | 455002 |        |
| cg05814312 | -0.0983765 | 0.11816537 | 6.99E-09 | 37 | 10 | 29760687  | SVIL;SVIL   | NM_021738 | Body;Body             | NA          | NA      | NA          | NA   | TRUE | NA          | NA          | NA           | NA           | TRUE   | 114704 |        |
| cg14507310 | -0.060973  | 0.05496377 | 7.33E-09 | 37 | 9  | 121285184 | NA          | NA        | NA                    | NA          | NA      | NA          | NA   | TRUE | NA          | NA          | NA           | NA           | NA     | 269799 |        |
| cg06724693 | 0.05060744 | -0.0565421 | 7.46E-09 | 37 | 1  | 3010896   | PRDM16;PR   | NM_022114 | Body;Body             | NA          | NA      | NA          | NA   | NA   | NA          | 1:3000575-3 | NA           | NA           | NA     | 131108 |        |
| cg01157559 | 0.10293745 | -0.0844211 | 7.47E-09 | 37 | 16 | 29166162  | NA          | NA        | NA                    | chr16:29169 | N_Shelf | NA          | NA   | NA   | TRUE        | 16:29073499 | NA           | NA           | NA     | 24385  |        |
| cg21325715 | -0.0744853 | 0.07343489 | 7.48E-09 | 37 | 17 | 80297128  | NA          | NA        | NA                    | NA          | NA      | NA          | NA   | TRUE | 17:77890417 | NA          | NA           | NA           | TRUE   | 380481 |        |
| cg26299044 | 0.1456224  | -0.0889675 | 7.48E-09 | 37 | 17 | 39021588  | KRT12       | NM_000223 | Body                  | chr17:39019 | S_Shore | NA          | NA   | NA   | NA          | NA          | NA           | NA           | NA     | 458880 |        |
| cg09735822 | 0.05866393 | -0.0490152 | 7.50E-09 | 37 | 12 | 133015059 | NA          | NA        | NA                    | chr12:13301 | N_Shore | NA          | NA   | NA   | NA          | NA          | 12:13152495  | NA           | NA     | 186097 |        |
| cg16348158 | 0.06274617 | -0.0484266 | 7.55E-09 | 37 | 1  | 3036916   | PRDM16;PR   | NM_022114 | Body;Body             | chr1:303806 | N_Shore | NA          | NA   | NA   | NA          | NA          | 1:3026721-3  | NA           | NA     | NA     | 300606 |
| cg00581154 | 0.06408306 | -0.0462851 | 7.98E-09 | 37 | 1  | 3123695   | PRDM16;PR   | NM_022114 | Body;Body             | NA          | NA      | NA          | NA   | NA   | NA          | 1:3113154-3 | NA           | NA           | NA     | 12384  |        |
| cg18740175 | 0.06314474 | -0.0768545 | 8.16E-09 | 37 | 20 | 50110833  | NFATC2;NFA  | NM_001136 | Body;Body;Body        | chr20:50108 | S_Shore | NA          | NA   | NA   | NA          | NA          | 20:50110492  | Promoter_A3  | NA     | 339982 |        |
| cg15261712 | 0.06990203 | -0.0688923 | 8.31E-09 | 37 | 7  | 92238248  | CDK6;CDK6   | NM_001259 | 3'UTR;3'UTR           | NA          | NA      | NA          | CDMR | NA   | NA          | NA          | NA           | NA           | NA     | 282910 |        |
| cg24049493 | 0.08982981 | -0.0876751 | 8.33E-09 | 37 | 1  | 42385941  | HIVEP3;HIVE | NM_024503 | TSS1500;TSS1500       | chr1:423836 | S_Shore | NA          | RDMR | NA   | NA          | NA          | 1:42385318-  | Promoter_A3  | NA     | 422820 |        |
| cg06791426 | 0.04769798 | -0.0486772 | 8.48E-09 | 37 | 12 | 133135361 | FBRSL1      | NM_001142 | Body                  | chr12:13313 | Island  | NA          | NA   | NA   | NA          | 12:13164508 | 12:13313439  | Unclassified | NA     | 132457 |        |
| cg00686915 | 0.07178301 | -0.0417823 | 8.87E-09 | 37 | 7  | 99076604  | ZNF789;ZNF  | NM_001013 | Body;Body             | NA          | NA      | NA          | NA   | NA   | NA          | NA          | 7:99076509-  | Promoter_A3  | NA     | 14489  |        |
| cg09098522 | 0.05742543 | -0.0193822 | 8.92E-09 | 37 | 10 | 31435673  | NA          | NA        | NA                    | NA          | NA      | NA          | NA   | TRUE | 10:31475651 | NA          | NA           | NA           | 175031 |        |        |
| cg06753787 | 0.0517263  | -0.0263477 | 9.25E-09 | 37 | 2  | 220074208 | ZFAND2B     | NM_138802 | 3'UTR                 | chr2:220071 | S_Shelf | NA          | NA   | NA   | NA          | NA          | NA           | NA           | NA     | 131663 |        |
| cg14873022 | 0.07704183 | -0.0359758 | 9.30E-09 | 37 | 4  | 146841701 | ZNF827      | NM_178835 | Body                  | NA          | NA      | NA          | NA   | NA   | NA          | NA          | NA           | NA           | TRUE   | 276612 |        |
| cg09349343 | 0.0508422  | -0.0469572 | 9.36E-09 | 37 | 6  | 33245717  | B3GALT4     | NM_003782 | 1stExon               | chr6:332446 | S_Shore | NA          | NA   | NA   | TRUE        | 6:33352687- | 6:33244505-  | Promoter_A3  | TRUE   | 179444 |        |
| cg19409579 | 0.11730148 | -0.0996669 | 9.44E-09 | 37 | 4  | 81118500  | PRDM8;PRDM  | NM_020226 | 5'UTR;TSS200          | chr4:811181 | Island  | NA          | NA   | NA   | NA          | 4:81336961- | 4:81118358-  | Unclassified | NA     | 350194 |        |
| cg10453071 | 0.04862244 | -0.0259726 | 9.48E-09 | 37 | 16 | 57513414  | DOK4        | NM_018110 | Body                  | NA          | NA      | NA          | NA   | TRUE | 16:56070737 | NA          | NA           | NA           | 198606 |        |        |
| cg21946195 | 0.04396948 | -0.0126419 | 9.48E-09 | 37 | 2  | 86012225  | ATOX8       | NM_032827 | Body                  | NA          | NA      | NA          | NA   | TRUE | NA          | NA          | NA           | NA           | TRUE   | 389751 |        |
| cg05945608 | 0.05226537 | -0.0361488 | 9.56E-09 | 37 | 6  | 42739639  | NA          | NA        | NA                    | NA          | NA      | NA          | NA   | TRUE | NA          | 6:42739603- | Promoter_A3  | NA           | 117213 |        |        |
| cg13244312 | 0.03317613 | -0.0284134 | 9.61E-09 | 37 | 14 | 71109707  | TTC9        | NM_015351 | Body                  | chr14:71108 | S_Shore | NA          | RDMR | NA   | NA          | NA          | NA           | NA           | NA     | 244208 |        |
| cg19679112 | 0.04094224 | -0.0171776 | 9.74E-09 | 37 | 17 | 30333737  | NA          | NA        | NA                    | chr17:30333 | N_Shore | NA          | NA   | NA   | NA          | NA          | 17:30333558  | Promoter_A3  | NA     | 354596 |        |
| cg15393490 | 0.05603455 | -0.0665845 | 9.79E-09 | 37 | 1  | 207996459 | NA          | NA        | NA                    | NA          | NA      | NA          | CDMR | TRUE | NA          | 1:207995893 | Promoter_A3  | TRUE         | 284769 |        |        |
| cg00548098 | -0.0864556 | 0.10517005 | 9.87E-09 | 37 | 16 | 11295667  | NA          | NA        | NA                    | NA          | NA      | NA          | NA   | TRUE | NA          | NA          | NA           | NA           | TRUE   | 11632  |        |
| cg23950233 | 0.08955365 | -0.0771024 | 9.94E-09 | 37 | 6  | 33245739  | B3GALT4     | NM_003782 | 1stExon               | chr6:332446 | S_Shore | NA          | NA   | NA   | TRUE        | 6:33352687- | 6:33244505-  | Promoter_A3  | TRUE   | 421004 |        |
| cg01671681 | -0.0522442 | 0.06053301 | 1.00E-08 | 37 | 3  | 155421735 | PLCH1       | NM_014996 | 5'UTR                 | NA          | NA      | NA          | NA   | TRUE | NA          | NA          | NA           | NA           | NA     | 34410  |        |
| cg02222982 | 0.06183969 | -0.0612594 | 1.00E-08 | 37 | 11 | 67207599  | CORO1B;COR  | NM_001018 | Body;Body             | chr11:67203 | S_Shelf | NA          | NA   | NA   | NA          | 11:66964001 | 11:67207594  | Unclassified | NA     | 45376  |        |
| cg18561976 | -0.0905596 | 0.09411298 | 1.03E-08 | 37 | 2  | 204801508 | ICOS;ICOS   | NM_012092 | 5'UTR;1stExon         | NA          | NA      | NA          | NA   | NA   | NA          | NA          | 2:204801321  | Unclassified | NA     | 337238 |        |
| cg18534312 | 0.02854554 | -0.0137428 | 1.03E-08 | 37 | 8  | 140642584 | KCNK9       | NM_016601 | Body                  | NA          | NA      | NA          | NA   | NA   | NA          | 8:140711730 | 8:140642475  | Unclassified | NA     | 336808 |        |
| cg10825530 | 0.09625531 | -0.0629191 | 1.07E-08 | 37 | 11 | 16023708  | SOX6;SOX6   | NM_033326 | Body;Body;Body;Body   | NA          | NA      | NA          | NA   | TRUE | NA          | NA          | NA           | NA           | TRUE   | 205041 |        |
| cg09931783 | 0.09005692 | -0.0790246 | 1.08E-08 | 37 | 12 | 123469669 | PITPNM2     | NM_020845 | 3'UTR                 | chr12:12347 | N_Shore | NA          | NA   | NA   | NA          | 12:12203519 | 12:12346966  | Unclassified | NA     | 189513 |        |
| cg17164345 | -0.0542719 | 0.04229896 | 1.09E-08 | 37 | 11 | 77271314  | NA          | NA        | NA                    | NA          | NA      | NA          | NA   | TRUE | NA          | NA          | NA           | NA           | NA     | 314516 |        |
| cg04554131 | 0.05342279 | -0.0418714 | 1.09E-08 | 37 | 1  | 25291540  | RUNX3       | NM_001031 | TSS200                | NA          | NA      | NA          | NA   | NA   | NA          | 1:25163972- | 1:25291322-  | Unclassified | NA     | 91201  |        |
| cg04681525 | 0.0374445  | -0.0107345 | 1.09E-08 | 37 | 9  | 132145577 | NA          | NA        | NA                    | chr9:132145 | Island  | NA          | NA   | NA   | TRUE        | NA          | 9:132145334  | Promoter_A3  | NA     | 93564  |        |
| cg18524934 | 0.0441409  | -0.0369781 | 1.10E-08 | 37 | 2  | 97164073  | NEURL3      | NR_026875 | Body                  | chr2:971662 | N_Shelf | NA          | NA   | NA   | NA          | NA          | NA           | NA           | NA     | 336645 |        |
| cg07443710 | -0.0959236 | 0.10605128 | 1.11E-08 | 37 | 10 | 71206848  | NA          | NA        | NA                    | NA          | NA      | NA          | NA   | TRUE | NA          | NA          | NA           | NA           | NA     | 145190 |        |
| cg17772649 | 0.05617992 | -0.0307018 | 1.12E-08 | 37 | 6  | 31691426  | C6orf25;C6o | NM_138274 | Body;Body;Body;Body   | chr6:316914 | Island  | NA          | NA   | NA   | NA          | NA          | 6:31799014-  | NA           | NA     | NA     | 324039 |
| cg24927174 | 0.06448973 | -0.0540609 | 1.14E-08 | 37 | 1  | 154942566 | SHC1;SHC1   | NM_003029 | Body;1stExon;Body;1st | chr1:154946 | N_Shelf | NA          | NA   | NA   | NA          | NA          | NA           | NA           | NA     | 437192 |        |
| cg16348385 | 0.03473785 | -0.0332803 | 1.15E-08 | 37 | 16 | 30106822  | YPEL3;YPEL3 | NM_031477 | 1stExon;5'UTR;5'UTR   | chr16:30107 | N_Shore | NA          | NA   | NA   | TRUE        | 16:30014183 | 16:30106818  | Promoter_A3  | NA     | 300612 |        |
| cg11186344 | -0.139281  | 0.12616358 | 1.17E-08 | 37 | 1  | 19253694  | IFFO2       | NM_001136 | Body                  | NA          | NA      | NA          | NA   | TRUE | NA          | 1:19252744- | Promoter_A3  | TRUE         | 210894 |        |        |
| cg19483007 | -0.0650391 | 0.05011874 | 1.18E-08 | 37 | 3  | 149327651 | VWVTR1;VWV  | NM_015472 | Body;Body;Body        | NA          | NA      | NA          | NA   | TRUE | NA          | 3:149327380 | Unclassified | NA           | 351364 |        |        |
| cg17178761 | 0.12477317 | -0.102671  | 1.19E-08 | 37 | 17 | 55682851  | MSI2;MSI2   | NM_138962 | Body;Body             | NA          | NA      | NA          | NA   | TRUE | NA          | 17:55682560 | Unclassified | NA           | 314795 |        |        |
| cg06897661 | 0.11036339 | -0.114606  |          |    |    |           |             |           |                       |             |         |             |      |      |             |             |              |              |        |        |        |

|            |            |            |          |    |    |           |                   |           |                         |              |         |             |      |      |             |             |              |              |        |        |
|------------|------------|------------|----------|----|----|-----------|-------------------|-----------|-------------------------|--------------|---------|-------------|------|------|-------------|-------------|--------------|--------------|--------|--------|
| cg02538891 | -0.0578538 | 0.05753666 | 1.24E-08 | 37 | 9  | 139549426 | NA                | NA        | NA                      | chr9:139551  | N_Shore | NA          | NA   | NA   | NA          | NA          | NA           | NA           | 51714  |        |
| cg13937758 | -0.0845052 | 0.0886205  | 1.24E-08 | 37 | 6  | 150217448 | NA                | NA        | NA                      | NA           | NA      | NA          | NA   | TRUE | NA          | 6:150217024 | Unclassified | TRUE         | 258085 |        |
| cg16039660 | 0.05775249 | -0.037094  | 1.26E-08 | 37 | 4  | 184686701 | NA                | NA        | NA                      | NA           | NA      | NA          | NA   | NA   | 4:184923695 | NA          | NA           | NA           | 295426 |        |
| cg10363926 | -0.0406944 | 0.0192488  | 1.30E-08 | 37 | 2  | 109921282 | SH3RF3            | NM_001099 | Body                    | NA           | NA      | NA          | NA   | NA   | NA          | NA          | NA           | NA           | 197137 |        |
| cg05525649 | 0.0465388  | -0.0398587 | 1.30E-08 | 37 | 6  | 32156269  | PBX2              | NM_002586 | Body                    | NA           | NA      | NA          | NA   | NA   | NA          | NA          | NA           | NA           | 109606 |        |
| cg14522990 | 0.0429065  | -0.0245976 | 1.36E-08 | 37 | 6  | 31691442  | C6orf25;C6orf25   | NM_138274 | Body;Body;Body;Body     | chr6:316914  | Island  | NA          | NA   | NA   | NA          | 6:31799014  | NA           | NA           | NA     | 270175 |
| cg23178192 | 0.03129531 | -0.0147094 | 1.38E-08 | 37 | 16 | 28075295  | GSGL              | NM_001109 | TSS1500                 | chr16:280734 | Island  | NA          | NA   | NA   | NA          | 16:28075032 | Unclassified | NA           | 408549 |        |
| cg02343628 | 0.13548264 | -0.0579835 | 1.39E-08 | 37 | 15 | 93790914  | NA                | NA        | NA                      | NA           | NA      | NA          | NA   | TRUE | NA          | NA          | NA           | NA           | 47875  |        |
| cg11846580 | 0.06332917 | -0.039214  | 1.40E-08 | 37 | 16 | 88590409  | ZFPM1             | NM_153813 | Body                    | chr16:885901 | Island  | NA          | NA   | NA   | NA          | 16:87117783 | NA           | NA           | NA     | 222007 |
| cg13992911 | -0.0670575 | 0.06036901 | 1.46E-08 | 37 | 5  | 1003504   | NA                | NA        | NA                      | chr5:100393  | N_Shore | NA          | CDMR | NA   | NA          | 5:1003409-1 | Unclassified | TRUE         | 259200 |        |
| cg10558233 | -0.1399286 | 0.1523904  | 1.49E-08 | 37 | 8  | 94892613  | NA                | NA        | NA                      | NA           | NA      | NA          | NA   | TRUE | NA          | NA          | NA           | NA           | 200569 |        |
| cg05701418 | -0.1560773 | 0.15801089 | 1.50E-08 | 37 | 6  | 30131361  | TRIM15;TRIM15     | NM_033229 | 5'UTR;1stExon           | NA           | NA      | NA          | NA   | TRUE | NA          | NA          | NA           | NA           | 112716 |        |
| cg07682160 | 0.06662021 | -0.0391438 | 1.51E-08 | 37 | 19 | 18959935  | UPF1              | NM_002911 | Body                    | NA           | NA      | NA          | NA   | RDMR | NA          | NA          | NA           | TRUE         | 149664 |        |
| cg14651616 | 0.06718063 | -0.0672635 | 1.55E-08 | 37 | 11 | 64563992  | MAP4K2            | NM_004579 | Body                    | NA           | NA      | NA          | NA   | NA   | NA          | NA          | NA           | NA           | 272843 |        |
| cg14207833 | 0.04539462 | -0.0434369 | 1.56E-08 | 37 | 19 | 18945153  | UPF1              | NM_002911 | Body                    | chr19:18942  | S_Shelf | NA          | NA   | TRUE | NA          | NA          | NA           | NA           | 263748 |        |
| cg20731257 | 0.05271475 | -0.0460107 | 1.56E-08 | 37 | 2  | 87883497  | NA                | NA        | NA                      | NA           | NA      | NA          | NA   | NA   | 2:87664612  | NA          | NA           | NA           | 371388 |        |
| cg21350153 | 0.05670112 | -0.051266  | 1.57E-08 | 37 | 2  | 95982371  | KCNIP3            | NM_013434 | Body                    | NA           | NA      | NA          | NA   | TRUE | NA          | 2:95982334  | Unclassified | TRUE         | 380796 |        |
| cg12282552 | 0.05226323 | -0.059337  | 1.58E-08 | 37 | 11 | 65321806  | LTBP3;LTBP3       | NM_001164 | Body;Body;Body          | chr11:65321  | Island  | NA          | NA   | NA   | NA          | NA          | NA           | NA           | 229295 |        |
| cg03485217 | -0.0702447 | 0.06972419 | 1.58E-08 | 37 | 4  | 10686300  | CLNK;CLNK         | NM_052964 | 1stExon;5'UTR           | NA           | NA      | NA          | NA   | NA   | NA          | NA          | NA           | NA           | 70465  |        |
| cg14047370 | -0.0974301 | 0.10807649 | 1.59E-08 | 37 | 7  | 43342206  | HECW1             | NM_015052 | Body                    | NA           | NA      | NA          | NA   | TRUE | NA          | NA          | NA           | TRUE         | 260439 |        |
| cg14556762 | -0.1118928 | 0.12931125 | 1.61E-08 | 37 | 1  | 170532470 | NA                | NA        | NA                      | NA           | NA      | NA          | NA   | TRUE | NA          | NA          | NA           | NA           | 270916 |        |
| cg23419447 | 0.05119583 | -0.0527206 | 1.61E-08 | 37 | 11 | 1507347   | HCCA2             | NM_053005 | Body                    | NA           | NA      | NA          | NA   | NA   | NA          | 11:1463835  | NA           | TRUE         | 412670 |        |
| cg13919908 | -0.0739588 | 0.08823121 | 1.63E-08 | 37 | 11 | 33394273  | NA                | NA        | NA                      | chr11:33397  | N_Shelf | NA          | NA   | NA   | NA          | NA          | NA           | TRUE         | 257686 |        |
| cg09225861 | 0.08753714 | -0.0871243 | 1.65E-08 | 37 | 11 | 65069680  | NA                | NA        | NA                      | NA           | NA      | NA          | NA   | TRUE | NA          | NA          | NA           | TRUE         | 177174 |        |
| cg26335760 | 0.06464216 | -0.0465012 | 1.66E-08 | 37 | 3  | 133606960 | RAB6B             | NM_016577 | Body                    | NA           | NA      | NA          | NA   | TRUE | NA          | NA          | NA           | NA           | 459552 |        |
| cg11203616 | 0.07354835 | -0.0728031 | 1.67E-08 | 37 | 7  | 47576580  | TNS3              | NM_022748 | 5'UTR                   | chr7:475765  | Island  | NA          | NA   | NA   | NA          | 7:47542529  | NA           | TRUE         | 211224 |        |
| cg10264003 | -0.0554381 | 0.02105983 | 1.67E-08 | 37 | 11 | 110198965 | NA                | NA        | NA                      | NA           | NA      | NA          | NA   | NA   | NA          | NA          | NA           | NA           | 195458 |        |
| cg07141605 | 0.06887587 | -0.0234234 | 1.67E-08 | 37 | 12 | 133005406 | NA                | NA        | NA                      | NA           | NA      | NA          | NA   | NA   | 12:1315149  | 12:13300533 | Unclassified | NA           | 139584 |        |
| cg12304937 | -0.067285  | 0.06741447 | 1.68E-08 | 37 | 7  | 680013    | PRKAR1B;PRKAR1B   | NM_001164 | Body;Body;Body;Body     | chr7:675569  | S_Shelf | NA          | NA   | NA   | NA          | NA          | NA           | NA           | 229656 |        |
| cg20005742 | 0.07168415 | -0.0621176 | 1.68E-08 | 37 | 14 | 103007070 | NA                | NA        | NA                      | chr14:10301  | N_Shelf | NA          | NA   | NA   | NA          | NA          | NA           | NA           | 360302 |        |
| cg08137888 | 0.03326302 | -0.015773  | 1.69E-08 | 37 | 20 | 825798    | FAM110A;FAM110A   | NM_001042 | Body;Body;1stExon       | chr20:82526  | Island  | NA          | NA   | NA   | NA          | 20:773285-7 | NA           | NA           | NA     | 157981 |
| cg01129459 | 0.04836609 | -0.0304956 | 1.72E-08 | 37 | 14 | 60386828  | NA                | NA        | NA                      | chr14:60386  | S_Shore | NA          | NA   | TRUE | NA          | 14:59455991 | 14:60386651  | Unclassified | TRUE   | 23791  |
| cg03546163 | -0.1374814 | 0.13357315 | 1.77E-08 | 37 | 6  | 35654363  | FKBP5;FKBP5       | NM_004117 | 5'UTR;5'UTR;5'UTR;5'UTR | chr6:356556  | N_Shore | NA          | NA   | NA   | NA          | NA          | NA           | NA           | 71700  |        |
| cg06853339 | 0.0839264  | -0.0791833 | 1.83E-08 | 37 | 17 | 76117687  | TMC6;TMC6         | NM_001127 | Body;Body               | NA           | NA      | NA          | NA   | NA   | NA          | 17:73629267 | 17:76117019  | Promoter_A5  | NA     | 133809 |
| cg06636678 | -0.0862212 | 0.07227036 | 1.86E-08 | 37 | 11 | 104576302 | NA                | NA        | NA                      | NA           | NA      | NA          | NA   | TRUE | NA          | 11:10457615 | Promoter_A5  | NA           | 129428 |        |
| cg26995224 | 0.06544329 | -0.0594805 | 1.89E-08 | 37 | 12 | 121974146 | KDM2B;KDM2B       | NM_032590 | Body;Body               | chr12:12197  | N_Shore | NA          | RDMR | TRUE | 12:12045839 | 12:12197407 | Promoter_A5  | NA           | 471115 |        |
| cg15586393 | 0.04637217 | -0.0481739 | 1.90E-08 | 37 | 4  | 12404086  | CTBP1;CTBP1       | NM_001328 | TSS1500;TSS1500;TSS1500 | chr4:124141  | Island  | NA          | NA   | NA   | NA          | NA          | NA           | NA           | 287831 |        |
| cg05992368 | 0.04365441 | -0.0431201 | 1.92E-08 | 37 | 17 | 1572755   | PRPF8             | NM_006445 | Body                    | NA           | NA      | NA          | NA   | TRUE | NA          | 17:1572650  | Gene_Assoc   | NA           | 118172 |        |
| cg19755435 | -0.116347  | 0.122658   | 1.93E-08 | 37 | 14 | 88473001  | GPR65             | NM_003608 | 5'UTR                   | NA           | NA      | NA          | NA   | NA   | NA          | 14:88472565 | Promoter_A5  | NA           | 356011 |        |
| cg06601581 | 0.06150638 | -0.0563289 | 1.93E-08 | 37 | 16 | 85404654  | NA                | NA        | NA                      | chr16:85407  | N_Shelf | NA          | NA   | TRUE | NA          | NA          | NA           | NA           | 128691 |        |
| cg17362247 | 0.05099091 | -0.0482449 | 1.96E-08 | 37 | 19 | 39788647  | IL29              | NM_172140 | Body                    | NA           | NA      | NA          | NA   | NA   | NA          | 19:39788587 | Unclassified | NA           | 317814 |        |
| cg01759628 | 0.05767771 | -0.0460102 | 1.98E-08 | 37 | 1  | 235266653 | NA                | NA        | NA                      | chr1:235267  | N_Shore | NA          | NA   | NA   | NA          | NA          | NA           | NA           | 36012  |        |
| cg03236948 | 0.06318906 | -0.0417686 | 2.00E-08 | 37 | 11 | 63997492  | DNAJC4            | NM_005528 | TSS1500                 | chr11:63997  | N_Shore | NA          | NA   | NA   | NA          | 11:63754001 | NA           | NA           | NA     | 65661  |
| cg03393889 | 0.04368246 | -0.049977  | 2.02E-08 | 37 | 16 | 2094700   | NTHL1             | NM_002528 | Body                    | chr16:20974  | N_Shelf | NA          | NA   | NA   | NA          | 16:2034603  | NA           | NA           | NA     | 68679  |
| cg05253759 | 0.04791192 | -0.0393928 | 2.06E-08 | 37 | 17 | 26941260  | FLJ25006          | NM_144610 | TSS200                  | NA           | NA      | NA          | NA   | TRUE | NA          | 17:26939618 | Gene_Assoc   | NA           | 104509 |        |
| cg12233463 | -0.1251786 | 0.13251749 | 2.10E-08 | 37 | 15 | 81679567  | NA                | NA        | NA                      | NA           | NA      | NA          | NA   | TRUE | NA          | NA          | NA           | NA           | 228587 |        |
| cg05164926 | 0.09087968 | -0.0342639 | 2.11E-08 | 37 | 17 | 7255624   | KCTD11;KCTD11     | NM_001002 | 5'UTR;1stExon           | chr17:72546  | Island  | high-CpG:71 | NA   | NA   | NA          | 17:7195142  | 17:7253029   | Promoter_A5  | NA     | 102830 |
| cg03173502 | 0.06158578 | -0.0605576 | 2.14E-08 | 37 | 6  | 15505345  | JARID2            | NM_004973 | Body                    | NA           | NA      | NA          | NA   | NA   | NA          | 6:15613324  | NA           | TRUE         | 64455  |        |
| cg01798157 | 0.09810773 | -0.1009299 | 2.17E-08 | 37 | 1  | 203276595 | BTG2              | NM_006763 | 3'UTR                   | chr1:203274  | S_Shore | NA          | NA   | NA   | NA          | 1:203276430 | Promoter_A5  | NA           | 36819  |        |
| cg09258479 | 0.03869873 | -0.016428  | 2.18E-08 | 37 | 1  | 47655861  | PDZK1IP1          | NM_005764 | TSS200                  | NA           | NA      | NA          | NA   | NA   | NA          | NA          | NA           | TRUE         | 177838 |        |
| cg00591515 | 0.05288223 | -0.0459071 | 2.19E-08 | 37 | 19 | 54971526  | LENG8             | NM_052925 | Body                    | chr19:54971  | N_Shore | NA          | NA   | NA   | NA          | NA          | NA           | NA           | 12648  |        |
| cg09685472 | -0.081531  | 0.09553974 | 2.20E-08 | 37 | 16 | 81527427  | CMIP              | NM_198390 | Body                    | NA           | NA      | NA          | NA   | TRUE | 16:80084844 | 16:81527395 | Unclassified | TRUE         | 185305 |        |
| cg10980948 | 0.05331359 | -0.056221  | 2.24E-08 | 37 | 17 | 80402614  | Cl1orf62;Cl1orf62 | NM_001100 | Body;Body;Body          | chr17:80402  | Island  | NA          | NA   | NA   | NA          | 17:77994485 | NA           | NA           | NA     | 207537 |
| cg26840970 | -0.0830626 | 0.07637787 | 2.25E-08 | 37 | 16 | 71523432  | ZNF19             | NM_006961 | TSS200                  | chr9:71160   | N_Shelf | NA          | NA   | NA   | NA          | 16:70080707 | NA           | NA           | NA     | 468319 |
| cg14260530 | 0.05341857 | -0.0495516 | 2.26E-08 | 37 | 9  | 117157871 | AKNA              | NM_030767 | TSS1500                 | chr9:117160  | N_Shelf | NA          | NA   | NA   | NA          | NA          | NA           | NA           | 264915 |        |
| cg02056751 | 0.05281141 | -0.0539745 | 2.30E-08 | 37 | 11 | 2320647   | Cl1orf21;Cl1orf21 | NR_024621 | Body;3'UTR              | NA           | NA      | NA          | NA   | NA   | NA          | 11:2320408  | Unclassified | TRUE         | 42153  |        |
| cg00853733 | 0.08602293 | -0.0945293 | 2.30E-08 | 37 | 12 | 122244223 | SETD1B            | NM_015048 | Body                    | chr12:12224  | S_Shore | NA          | RDMR | NA   | NA          | 12:12224406 | Promoter_A5  | NA           | 17979  |        |
| cg08324862 | -0.0868428 | 0.07473822 | 2.37E-08 | 37 | 12 | 77800655  | NA                | NA        | NA                      | NA           | NA      | NA          | NA   | TRUE | NA          | NA          | NA           | NA           | 161538 |        |
| cg05122026 | 0.04821969 | -0.0453393 | 2.39E-08 | 37 | 11 | 75114223  | SNORD15B;SNORD15B | NR_000025 | TSS1500;Body            | chr11:75110  | S_Shelf | NA          | NA   | NA   | NA          | NA          | NA           | NA           | 101963 |        |
| cg15696506 | -0.0863441 | 0.10300269 | 2.40E-08 | 37 | 4  | 57947735  | IGFBP7            | NM_001553 | Body                    | NA           | NA      | NA          | NA   | TRUE | NA          | NA          | NA           | TRUE         | 289747 |        |
| cg10816169 | 0.0534987  | -0.0466341 | 2.40E-08 | 37 | 11 | 66080868  | NA                | NA        | NA                      | chr11:66079  | Island  | NA          | NA   | NA   | NA          | 11:65835972 | 11:66078582  | Promoter_A5  | NA     | 204854 |
| cg19570155 | 0.0796953  | -0.0746675 | 2.46E-08 | 37 | 2  | 36765605  | CRIM1             | NM_016441 | Body                    | NA           | NA      | NA          | NA   | TRUE | NA          | NA          | NA           | NA           | 352781 |        |
| cg23461714 | 0.04821157 | -0.0356474 | 2.54E-08 | 37 | 11 | 113184990 | TTC12             | NM_017868 | TSS1500                 | chr11:11318  | N_Shore | NA          | NA   | NA   | NA          | 11:11318483 | Promoter_A5  | NA           | 413266 |        |
| cg04952324 | 0.04551174 | -0.0222722 | 2.56E-08 | 37 | 7  | 73727108  | CLIP2;CLIP2       | NM_032421 | 5'UTR;5'UTR             | NA           | NA      | NA          | NA   | TRUE | NA          | NA          | NA           | TRUE         | 98825  |        |
| cg26196424 | -0.0608063 | 0.05314855 | 2.64E-08 | 37 | 14 | 58615960  | Cl4orf37          | NM_001001 | 5'UTR                   | chr14:58618  |         |             |      |      |             |             |              |              |        |        |

|            |            |            |          |    |    |           |              |           |                           |             |         |             |      |      |               |                |                |        |        |
|------------|------------|------------|----------|----|----|-----------|--------------|-----------|---------------------------|-------------|---------|-------------|------|------|---------------|----------------|----------------|--------|--------|
| cg03726147 | 0.03972996 | -0.03474   | 2.74E-08 | 37 | 1  | 44686022  | DMAP1;DMA    | NM_019100 | Body;Body;Body            | NA          | NA      | NA          | NA   | TRUE | 1:44458547-1  | 1:44685614-1   | Gene_Assoc     | NA     | 75286  |
| cg07461273 | 0.05980954 | -0.0640734 | 2.79E-08 | 37 | 7  | 99697172  | MCM7;MCM     | NM_005916 | Body;5'UTR                | chr7:996981 | N_Shore | NA          | NA   | NA   | 7:99535108-1  | NA             | NA             | NA     | 145498 |
| cg26928195 | 0.05675409 | -0.0514457 | 2.81E-08 | 37 | 19 | 1624734   | TCF3;TCF3    | NM_003200 | Body;Body                 | chr19:16253 | N_Shore | NA          | NA   | NA   | 19:1575448-1  | 19:1624446-1   | Gene_Assoc     | TRUE   | 469898 |
| cg04968127 | 0.07071385 | -0.066466  | 2.84E-08 | 37 | 11 | 10715213  | MRV11;MRV    | NM_001100 | 1stExon;5'UTR;1stExon     | NA          | NA      | low-CpG:106 | NA   | TRUE | NA            | NA             | NA             | NA     | 99102  |
| cg19295068 | 0.06620466 | -0.0509753 | 2.88E-08 | 37 | 19 | 48206119  | GLTSCR1      | NM_015711 | 3'UTR                     | chr19:48204 | S_Shore | NA          | NA   | NA   | 19:52896368   | NA             | NA             | NA     | 348448 |
| cg26376241 | -0.1093188 | 0.14522179 | 2.94E-08 | 37 | 2  | 65594021  | SPRED2;SPR   | NM_001128 | TSS200;Body               | NA          | NA      | NA          | NA   | TRUE | NA            | NA             | NA             | TRUE   | 460318 |
| cg12716083 | 0.05093774 | -0.0441463 | 2.96E-08 | 37 | 6  | 30559087  | ABCF1;ABCF   | NM_001090 | 3'UTR;3'UTR               | NA          | NA      | NA          | NA   | TRUE | NA            | NA             | NA             | TRUE   | 236175 |
| cg12155969 | 0.05664478 | -0.0331491 | 2.97E-08 | 37 | 15 | 92849000  | NA           | NA        | NA                        | NA          | NA      | NA          | NA   | TRUE | NA            | NA             | NA             | NA     | 227282 |
| cg25730428 | 0.05289149 | -0.0326714 | 3.04E-08 | 37 | 6  | 29454755  | MAS1L        | NM_052967 | 1stExon                   | NA          | NA      | NA          | NA   | NA   | NA            | NA             | NA             | NA     | 449732 |
| cg23051123 | 0.03739626 | -0.02955   | 3.09E-08 | 37 | 1  | 226132841 | NA           | NA        | NA                        | NA          | NA      | NA          | NA   | TRUE | NA            | 1:226132766    | Unclassified   | NA     | 406503 |
| cg24136318 | 0.05314018 | -0.0613718 | 3.09E-08 | 37 | 17 | 75454130  | SEPT9;SEPT9  | NM_001113 | Body;5'UTR;Body;Body      | NA          | NA      | NA          | NA   | TRUE | NA            | NA             | NA             | NA     | 424317 |
| cg26169081 | 0.06343801 | -0.0722517 | 3.11E-08 | 37 | 10 | 12648338  | CAMK1D;CAM   | NM_020397 | Body;Body                 | NA          | NA      | NA          | NA   | TRUE | 10:12688103   | 10:12647615    | Promoter_Assoc | NA     | 456656 |
| cg26929394 | -0.0653326 | 0.04933147 | 3.13E-08 | 37 | 11 | 112435198 | NA           | NA        | NA                        | NA          | NA      | NA          | NA   | TRUE | NA            | NA             | NA             | NA     | 469925 |
| cg17652998 | 0.04225228 | -0.03705   | 3.15E-08 | 37 | 10 | 101370592 | SLC25A28     | NM_031212 | 3'UTR                     | NA          | NA      | NA          | NA   | NA   | NA            | NA             | NA             | NA     | 322340 |
| cg05242915 | 0.0736463  | -0.0646129 | 3.16E-08 | 37 | 19 | 1263080   | NA           | NA        | NA                        | chr19:12602 | S_Shore | NA          | DMR  | NA   | NA            | NA             | NA             | NA     | 104329 |
| cg05969150 | 0.03593008 | -0.0216793 | 3.16E-08 | 37 | 16 | 72882495  | ZFH3;ZFH3    | NM_001164 | Body;Body                 | NA          | NA      | NA          | NA   | TRUE | NA            | NA             | NA             | TRUE   | 117686 |
| cg03125341 | 0.05031465 | -0.0312543 | 3.23E-08 | 37 | 6  | 157882207 | ZDHHC14;ZD   | NM_153746 | Body;Body                 | NA          | NA      | NA          | NA   | TRUE | NA            | 6:157882056    | Unclassified   | NA     | 63504  |
| cg19087971 | 0.06536632 | -0.0597797 | 3.23E-08 | 37 | 7  | 751233    | PRKAR1B;PR   | NM_002735 | 5'UTR;5'UTR;5'UTR;5'UTR   | chr7:750788 | Island  | NA          | NA   | NA   | 7:717343-71   | NA             | NA             | TRUE   | 345403 |
| cg19838043 | 0.05751016 | -0.05664   | 3.24E-08 | 37 | 14 | 104196038 | ZFYVE21      | NM_024071 | Body                      | chr14:10419 | S_Shore | NA          | NA   | NA   | 14:10326563   | 14:10419598    | Gene_Assoc     | TRUE   | 357457 |
| cg18073471 | 0.08611639 | -0.0659923 | 3.28E-08 | 37 | 4  | 81119198  | PRDM8;PRDM   | NM_020226 | 5'UTR;5'UTR               | chr4:811190 | Island  | NA          | NA   | NA   | 4:81338101-1  | 4:81118358-1   | Unclassified   | NA     | 328986 |
| cg17439800 | 0.06974562 | -0.0658323 | 3.28E-08 | 37 | 1  | 208056493 | NA           | NA        | NA                        | NA          | NA      | NA          | NA   | NA   | NA            | 1:208056036    | Promoter_Assoc | NA     | 319069 |
| cg09546258 | -0.0753792 | 0.08644381 | 3.31E-08 | 37 | 11 | 68444995  | NA           | NA        | NA                        | NA          | NA      | NA          | NA   | TRUE | NA            | NA             | NA             | TRUE   | 182892 |
| cg20587874 | -0.087453  | 0.11706553 | 3.32E-08 | 37 | 2  | 179269232 | MIR548N      | NR_031666 | Body                      | NA          | NA      | NA          | NA   | TRUE | NA            | 2:179269210    | Unclassified   | NA     | 368967 |
| cg05673882 | -0.0668438 | 0.07855897 | 3.33E-08 | 37 | 5  | 74862702  | POLK         | NM_016218 | Body                      | NA          | NA      | NA          | NA   | TRUE | NA            | NA             | NA             | NA     | 112278 |
| cg02512902 | -0.0977855 | 0.07117783 | 3.36E-08 | 37 | 17 | 25799447  | KSR1         | NM_014238 | 5'UTR                     | NA          | NA      | NA          | NA   | TRUE | NA            | NA             | NA             | NA     | 51195  |
| cg00294382 | 0.05993509 | -0.0434013 | 3.37E-08 | 37 | 12 | 56732721  | IL23A;IL23A  | NM_016584 | 5'UTR;1stExon             | NA          | NA      | NA          | NA   | TRUE | NA            | 12:56732294    | Promoter_Assoc | NA     | 6197   |
| cg26790897 | 0.07776493 | -0.0626262 | 3.38E-08 | 37 | 7  | 56147772  | SUMF2;SUM    | NM_001042 | 3'UTR;3'UTR;3'UTR;3'UTR   | NA          | NA      | NA          | NA   | TRUE | NA            | 7:56146865     | Gene_Assoc     | NA     | 467320 |
| cg13522406 | 0.07160924 | -0.0517192 | 3.39E-08 | 37 | 6  | 30581820  | PPPR10       | NM_002714 | 5'UTR                     | chr6:305848 | N_Shelf | NA          | NA   | NA   | NA            | NA             | NA             | NA     | 249516 |
| cg17038235 | 0.07326067 | -0.0485955 | 3.42E-08 | 37 | 5  | 172370524 | ERGIC1       | NM_001031 | Body                      | NA          | NA      | NA          | NA   | TRUE | NA            | NA             | NA             | TRUE   | 312466 |
| cg15251319 | 0.04272655 | -0.043615  | 3.42E-08 | 37 | 3  | 194836302 | C3orf21      | NM_152531 | Body                      | NA          | NA      | NA          | NA   | NA   | 3:196317591   | NA             | NA             | NA     | 282765 |
| cg07183799 | 0.0476577  | -0.0531142 | 3.48E-08 | 37 | 13 | 107214285 | ARGLU1       | NM_018011 | Body                      | NA          | NA      | NA          | NA   | TRUE | NA            | NA             | NA             | NA     | 140520 |
| cg09085220 | 0.03445511 | -0.0251791 | 3.49E-08 | 37 | 16 | 8736433   | C16orf68     | NM_024109 | Body                      | NA          | NA      | NA          | NA   | NA   | 16:8643828-1  | NA             | NA             | NA     | 174820 |
| cg00382138 | -0.1302134 | 0.17587277 | 3.50E-08 | 37 | 4  | 110723299 | CFI;CFI      | NM_000204 | 1stExon;5'UTR             | NA          | NA      | low-CpG:110 | NA   | NA   | NA            | NA             | NA             | NA     | 8086   |
| cg26550214 | -0.1388842 | 0.11679721 | 3.58E-08 | 37 | 5  | 34609493  | NA           | NA        | NA                        | NA          | NA      | NA          | NA   | TRUE | NA            | NA             | NA             | TRUE   | 463314 |
| cg20100049 | 0.05846516 | -0.0599712 | 3.59E-08 | 37 | 11 | 67979188  | SUV420H1;S   | NM_017635 | 5'UTR;5'UTR               | chr11:67980 | N_Shore | NA          | NA   | NA   | 11:67735641-1 | 11:67978656    | Promoter_Assoc | NA     | 361719 |
| cg07699845 | 0.06208977 | -0.0336059 | 3.59E-08 | 37 | 8  | 38068205  | BAG4         | NM_004874 | 3'UTR                     | NA          | NA      | NA          | NA   | NA   | NA            | NA             | NA             | NA     | 149984 |
| cg25207828 | 0.04412639 | -0.0258098 | 3.68E-08 | 37 | 3  | 9791044   | OGG1;OGG1    | NM_016828 | TSS1500;TSS1500;TSS       | chr3:979112 | N_Shore | NA          | NA   | NA   | NA            | 3:9790917-9    | Promoter_Assoc | NA     | 441619 |
| cg25410739 | 0.0409188  | -0.0234853 | 3.73E-08 | 37 | 1  | 223743086 | CAPN8        | NM_001143 | Body                      | chr1:223741 | Island  | NA          | NA   | NA   | 1:221808589   | NA             | NA             | NA     | 444806 |
| cg09567048 | -0.0490802 | 0.03366214 | 3.77E-08 | 37 | 2  | 46456880  | NA           | NA        | NA                        | NA          | NA      | NA          | NA   | TRUE | NA            | 2:46456844     | Unclassified   | NA     | 183306 |
| cg27395208 | 0.03115919 | -0.0148301 | 3.80E-08 | 37 | 11 | 128557481 | NA           | NA        | NA                        | chr11:12856 | N_Shelf | NA          | RDMR | NA   | 11:12806245   | NA             | NA             | TRUE   | 477868 |
| cg20605134 | 0.0431017  | -0.011442  | 3.85E-08 | 37 | 6  | 15400462  | JARID2       | NM_004973 | Body                      | NA          | NA      | NA          | RDMR | TRUE | NA            | NA             | NA             | TRUE   | 369233 |
| cg03254465 | 0.08576125 | -0.0521348 | 3.87E-08 | 37 | 1  | 3240227   | PRDM16;PRDM  | NM_022114 | Body;Body                 | chr1:323991 | Island  | NA          | NA   | NA   | 1:3229442-3   | NA             | NA             | NA     | 65971  |
| cg24074477 | 0.06850977 | -0.0437392 | 3.89E-08 | 37 | 22 | 17956455  | CECR2        | NM_031413 | TSS200                    | NA          | NA      | NA          | NA   | NA   | NA            | NA             | NA             | NA     | 423231 |
| cg14702960 | -0.0427359 | 0.03058362 | 3.89E-08 | 37 | 12 | 68634040  | NA           | NA        | NA                        | NA          | NA      | NA          | NA   | TRUE | NA            | NA             | NA             | TRUE   | 273742 |
| cg16903269 | -0.0556645 | 0.03440794 | 3.93E-08 | 37 | 7  | 134250389 | AKR1B15      | NM_001080 | Body                      | NA          | NA      | NA          | NA   | NA   | NA            | NA             | NA             | NA     | 310381 |
| cg01101873 | 0.05801601 | -0.0376201 | 3.93E-08 | 37 | 1  | 3269478   | PRDM16;PRDM  | NM_022114 | Body;Body                 | NA          | NA      | NA          | NA   | TRUE | 1:3259175-3   | NA             | NA             | TRUE   | 23259  |
| cg10437265 | 0.03398728 | -0.0126757 | 3.97E-08 | 37 | 15 | 77819839  | NA           | NA        | NA                        | NA          | NA      | NA          | NA   | TRUE | NA            | NA             | NA             | NA     | 198328 |
| cg02916283 | -0.0762554 | 0.06711148 | 4.00E-08 | 37 | 14 | 90087792  | NA           | NA        | NA                        | chr14:90085 | S_Shelf | NA          | NA   | NA   | 14:90087339   | Unclassified   | NA             | 59322  |        |
| cg07835482 | -0.1596282 | 0.17224721 | 4.10E-08 | 37 | 2  | 182656091 | NA           | NA        | NA                        | NA          | NA      | NA          | NA   | TRUE | NA            | NA             | NA             | NA     | 152502 |
| cg21618521 | 0.06884673 | -0.0611936 | 4.12E-08 | 37 | 6  | 33245770  | B3GALT4      | NM_003782 | 1stExon                   | chr6:332446 | S_Shore | NA          | NA   | TRUE | 6:33352687-1  | 6:33244505-1   | Promoter_Assoc | NA     | 384872 |
| cg17366225 | -0.0855571 | 0.10789046 | 4.28E-08 | 37 | 4  | 11398983  | NA           | NA        | NA                        | chr4:114007 | N_Shore | NA          | NA   | NA   | NA            | NA             | NA             | NA     | 317865 |
| cg26351132 | -0.0555069 | 0.05191611 | 4.30E-08 | 37 | 17 | 47049890  | NA           | NA        | NA                        | NA          | NA      | NA          | DMR  | TRUE | NA            | NA             | NA             | TRUE   | 459862 |
| cg11077681 | 0.07219768 | -0.0544564 | 4.34E-08 | 37 | 11 | 10715188  | MRV11;MRV    | NM_001100 | 1stExon;5'UTR;1stExon     | NA          | NA      | low-CpG:106 | NA   | TRUE | NA            | NA             | NA             | NA     | 209173 |
| cg05517572 | 0.05190296 | -0.0496782 | 4.34E-08 | 37 | 19 | 4338769   | STAP2;STAP2  | NM_001013 | 1stExon;5'UTR;5'UTR;5'UTR | NA          | NA      | NA          | NA   | NA   | NA            | NA             | NA             | TRUE   | 109474 |
| cg12656312 | -0.0742123 | 0.04312126 | 4.39E-08 | 37 | 11 | 6024266   | OR56A4       | NM_001005 | 1stExon                   | NA          | NA      | NA          | NA   | NA   | NA            | NA             | NA             | NA     | 235307 |
| cg10038867 | -0.0410298 | 0.04559903 | 4.39E-08 | 37 | 1  | 21982511  | RAP1GAP;RAP  | NM_002885 | 5'UTR;5'UTR               | chr1:219857 | N_Shelf | NA          | NA   | NA   | NA            | NA             | NA             | TRUE   | 191296 |
| cg26657404 | 0.06015484 | -0.0885157 | 4.42E-08 | 37 | 16 | 85684821  | KIAA0182;KIA | NM_001134 | Body;Body                 | chr16:85684 | S_Shore | NA          | NA   | NA   | 16:84241637-1 | 16:85684742    | Unclassified   | NA     | 465073 |
| cg16672223 | 0.03776147 | -0.0237401 | 4.45E-08 | 37 | 16 | 81650677  | CMIP;CMIP    | NM_030629 | Body;Body                 | NA          | NA      | NA          | NA   | TRUE | NA            | 16:81649729    | Promoter_Assoc | TRUE   | 306563 |
| cg02218324 | 0.05209913 | -0.0374205 | 4.47E-08 | 37 | 19 | 46318439  | RSPH6A;RSP   | NM_030785 | 1stExon;5'UTR             | chr19:46318 | N_Shore | NA          | NA   | NA   | 19:51010222   | NA             | NA             | NA     | 45287  |
| cg26729204 | 0.04759119 | -0.0568786 | 4.72E-08 | 37 | 6  | 2932241   | NA           | NA        | NA                        | NA          | NA      | NA          | NA   | TRUE | NA            | 6:2931511-2    | Unclassified   | NA     | 466390 |
| cg06653796 | 0.06608232 | -0.0817813 | 4.79E-08 | 37 | 20 | 62367805  | LIME1        | NM_017806 | TSS200                    | chr20:62368 | N_Shore | NA          | CDMR | NA   | 20:62367587   | Promoter_Assoc | NA             | 129796 |        |
| cg21348975 | -0.0540318 | 0.03648511 | 4.82E-08 | 37 | 12 | 48724119  | NA           | NA        | NA                        | chr12:48723 | S_Shore | NA          | NA   | NA   | NA            | NA             | NA             | NA     | 380778 |
| cg04119529 | 0.04517609 | -0.0428413 | 4.85E-08 | 37 | 16 | 2094667   | NTHL1        | NM_002528 | Body                      | chr16:20974 | N_Shelf | NA          | NA   | NA   | 16:2034603-1  | NA             | NA             | NA     | 82758  |
| cg22959742 | 0.08656515 | -0.0594792 | 4.90E-08 | 37 | 10 | 13913931  | FRMD4A       | NM_018027 | Body                      | NA          | NA      | NA          | NA   | TRUE | NA            | NA             | NA             | NA     | 404921 |
| cg01904812 | 0.09582991 | -0.0815951 | 4.93E-08 | 3  |    |           |              |           |                           |             |         |             |      |      |               |                |                |        |        |

|            |            |            |          |    |    |           |              |           |                      |             |         |             |      |      |             |              |              |        |        |
|------------|------------|------------|----------|----|----|-----------|--------------|-----------|----------------------|-------------|---------|-------------|------|------|-------------|--------------|--------------|--------|--------|
| cg12804791 | 0.07783942 | -0.0536644 | 5.02E-08 | 37 | 11 | 126286828 | NA           | NA        | NA                   | chr11:12628 | Island  | NA          | DMR  | TRUE | 11:12579168 | NA           | NA           | TRUE   | 237513 |
| cg19548859 | 0.09384672 | -0.0510315 | 5.03E-08 | 37 | 10 | 11239482  | CUGBP2;CUG   | NM_001025 | Body;Body;Body;Body  | NA          | NA      | NA          | NA   | TRUE | NA          | 10:11239247  | Promoter_A5  | NA     | 352475 |
| cg25299364 | -0.0565199 | 0.05526522 | 5.04E-08 | 37 | 2  | 68882144  | PROKR1       | NM_138964 | Body                 | chr2:688823 | N_Shore | NA          | NA   | NA   | 2:68735621  | NA           | NA           | NA     | 442921 |
| cg04347477 | 0.05358106 | -0.0187845 | 5.05E-08 | 37 | 12 | 125002007 | NCO2;NCO     | NM_006312 | 5'UTR;5'UTR          | chr12:12500 | Island  | NA          | NA   | NA   | 12:12356792 | NA           | NA           | NA     | 87306  |
| cg10000764 | -0.1091756 | 0.07425724 | 5.05E-08 | 37 | 7  | 129494118 | UBE2H;UBE    | NM_003344 | Body;Body            | NA          | NA      | NA          | NA   | TRUE | NA          | NA           | NA           | NA     | 190635 |
| cg24859236 | 0.05443794 | -0.049271  | 5.08E-08 | 37 | 1  | 9750213   | PIK3CD       | NM_005026 | 5'UTR                | chr1:974929 | Island  | NA          | NA   | NA   | 1:9671695-9 | 1:9748906-9  | Unclassified | NA     | 436007 |
| cg01368075 | 0.05577054 | -0.0497962 | 5.10E-08 | 37 | 3  | 128523902 | RAB7A        | NM_004637 | Body                 | NA          | NA      | NA          | NA   | TRUE | NA          | NA           | NA           | NA     | 28435  |
| cg21408813 | -0.1512158 | 0.13167143 | 5.27E-08 | 37 | 13 | 52736798  | NA           | NA        | NA                   | chr13:52733 | S_Shelf | NA          | NA   | NA   | NA          | NA           | TRUE         | NA     | 381528 |
| cg12170787 | -0.1114461 | 0.10188836 | 5.29E-08 | 37 | 19 | 1130965   | SBN02;SBN    | NM_001100 | Body;Body            | NA          | NA      | NA          | DMR  | NA   | 19:1130697- | Promoter_A5  | NA           | 227555 |        |
| cg10501360 | 0.06313828 | -0.0516397 | 5.31E-08 | 37 | 10 | 49671665  | ARHGAP22     | NM_021226 | Body                 | chr10:49674 | N_Shelf | NA          | NA   | TRUE | NA          | NA           | NA           | NA     | 199436 |
| cg26172016 | -0.0567299 | 0.02831319 | 5.34E-08 | 37 | 18 | 56529149  | ZNF532       | NM_018181 | TSS1500              | chr18:56530 | N_Shore | NA          | RDMR | NA   | 18:56529108 | Unclassified | NA           | 456704 |        |
| cg11216632 | 0.03494973 | -0.0219435 | 5.37E-08 | 37 | 1  | 155944655 | ARHGEF2;AR   | NM_001162 | Body;Body;5'UTR      | chr1:155947 | N_Shelf | NA          | NA   | NA   | 1:155944541 | Promoter_A5  | NA           | 211459 |        |
| cg14471064 | 0.0368553  | -0.0278381 | 5.50E-08 | 37 | 9  | 139236663 | GP5M1        | NM_001145 | Body                 | chr9:139236 | N_Shore | NA          | NA   | NA   | 9:139236401 | Unclassified | NA           | 269071 |        |
| cg05036937 | -0.0426254 | 0.03283904 | 5.58E-08 | 37 | 5  | 52283760  | ITGA2        | NM_002203 | TSS1500              | chr5:522847 | N_Shore | NA          | NA   | NA   | NA          | NA           | NA           | NA     | 100423 |
| cg07452706 | 0.04112467 | -0.0189248 | 5.65E-08 | 37 | 14 | 105649097 | NUDT14       | NM_177533 | TSS1500              | chr14:10564 | S_Shore | NA          | NA   | NA   | 14:10564888 | Unclassified | NA           | 145340 |        |
| cg00472758 | 0.08660148 | -0.0831749 | 5.67E-08 | 37 | 16 | 2552820   | TBC1D24      | NM_020705 | 3'UTR                | chr16:25520 | S_Shelf | NA          | NA   | TRUE | NA          | 16:2552796-  | Unclassified | NA     | 10014  |
| cg06469726 | -0.0739571 | 0.05724217 | 5.70E-08 | 37 | 2  | 242483467 | NA           | NA        | NA                   | chr2:242480 | S_Shore | NA          | NA   | NA   | NA          | NA           | TRUE         | NA     | 126290 |
| cg20458044 | -0.0444032 | 0.03802798 | 5.70E-08 | 37 | 17 | 57904327  | TMEM49       | NM_030938 | Body                 | NA          | NA      | NA          | NA   | TRUE | NA          | NA           | NA           | NA     | 367033 |
| cg18394552 | 0.08568754 | -0.0639249 | 5.73E-08 | 37 | 5  | 159428643 | NA           | NA        | NA                   | NA          | NA      | NA          | NA   | TRUE | NA          | NA           | NA           | NA     | 334402 |
| cg05500734 | -0.0683784 | 0.0841114  | 5.75E-08 | 37 | 7  | 73437649  | NA           | NA        | NA                   | NA          | NA      | NA          | NA   | TRUE | NA          | 7:73437299-  | Unclassified | TRUE   | 109124 |
| cg03345925 | 0.05479995 | -0.0649302 | 5.80E-08 | 37 | 8  | 144599347 | CZCH3        | NM_015117 | Body                 | chr8:144601 | N_Shelf | NA          | NA   | NA   | 8:144670116 | 8:144598000  | Unclassified | NA     | 67771  |
| cg02879453 | 0.08522057 | -0.0855938 | 5.81E-08 | 37 | 16 | 50321818  | ADCY7        | NM_001114 | TSS200               | NA          | NA      | NA          | NA   | NA   | NA          | NA           | NA           | NA     | 58518  |
| cg27526649 | 0.05158892 | -0.0307938 | 5.81E-08 | 37 | 1  | 208132004 | NA           | NA        | NA                   | chr1:208132 | N_Shore | NA          | NA   | NA   | 1:208131746 | Unclassified | NA           | 479997 |        |
| cg17507897 | -0.0492483 | 0.02163227 | 5.94E-08 | 37 | 20 | 17943694  | SNX5;SNOR    | NM_014426 | Body;TSS200;Body     | NA          | NA      | NA          | NA   | NA   | NA          | NA           | NA           | NA     | 320236 |
| cg22729726 | 0.040488   | -0.0219711 | 5.98E-08 | 37 | 1  | 3123854   | PRDM16;PR    | NM_022114 | Body;Body            | NA          | NA      | NA          | NA   | NA   | 1:3113664-3 | NA           | NA           | NA     | 401161 |
| cg13578465 | 0.06947786 | -0.074835  | 6.03E-08 | 37 | 14 | 105167457 | INF2;INF2;IN | NM_022489 | 5'UTR;5'UTR;5'UTR    | chr14:10516 | Island  | high-CpG:10 | NA   | NA   | 14:10423832 | NA           | NA           | NA     | 250731 |
| cg23464284 | 0.09553962 | -0.0821277 | 6.07E-08 | 37 | 6  | 166996837 | RPS6KA2;RP   | NM_021135 | Body;Body            | NA          | NA      | NA          | NA   | TRUE | NA          | NA           | NA           | NA     | 413319 |
| cg18833140 | -0.0410844 | 0.03378692 | 6.08E-08 | 37 | 10 | 115312553 | HABP2        | NM_004132 | TSS1500              | NA          | NA      | NA          | NA   | NA   | NA          | NA           | NA           | NA     | 341599 |
| cg11155784 | 0.0330613  | -0.0058554 | 6.12E-08 | 37 | 1  | 164572163 | PBX1         | NM_002585 | Body                 | NA          | NA      | NA          | NA   | TRUE | NA          | NA           | NA           | NA     | 210423 |
| cg24843346 | 0.06336886 | -0.058543  | 6.13E-08 | 37 | 8  | 142736091 | NA           | NA        | NA                   | chr8:142734 | S_Shore | NA          | NA   | NA   | NA          | NA           | NA           | NA     | 435720 |
| cg25072766 | 0.08397706 | -0.0733384 | 6.21E-08 | 37 | 11 | 3073488   | CARS;CARS;C  | NM_001014 | Body;Body;5'UTR;Body | NA          | NA      | NA          | NA   | NA   | 11:3029984- | NA           | NA           | NA     | 439518 |
| cg05573550 | 0.04576104 | -0.0256694 | 6.29E-08 | 37 | 4  | 148890890 | ARHGAP10     | NM_024605 | Body                 | NA          | NA      | NA          | NA   | TRUE | NA          | NA           | NA           | NA     | 110404 |
| cg01839993 | 0.04031678 | -0.0460775 | 6.38E-08 | 37 | 10 | 74034644  | DDIT4        | NM_019058 | Body                 | chr10:74033 | Island  | NA          | NA   | NA   | 10:73703174 | 10:74034192  | Promoter_A5  | NA     | 37786  |
| cg10369363 | 0.04437302 | -0.021023  | 6.46E-08 | 37 | 12 | 52404422  | GRASP        | NM_181711 | Body                 | chr12:52408 | N_Shelf | NA          | NA   | TRUE | NA          | 12:52403987  | Unclassified | TRUE   | 197237 |
| cg01400671 | 0.05812753 | -0.04422   | 6.55E-08 | 37 | 9  | 90622100  | NA           | NA        | NA                   | chr9:906215 | Island  | NA          | NA   | NA   | 9:89811409- | NA           | NA           | NA     | 29099  |
| cg09645475 | 0.04184801 | -0.0386436 | 6.57E-08 | 37 | 20 | 815316    | FAM110A;FA   | NM_207121 | TSS1500;5'UTR        | chr20:81412 | S_Shore | NA          | NA   | NA   | 20:813724-8 | Promoter_A5  | NA           | 184610 |        |
| cg19719478 | -0.0644918 | 0.05499803 | 6.65E-08 | 37 | 12 | 13529218  | C12orf36     | NM_182558 | Body                 | NA          | NA      | NA          | NA   | NA   | NA          | NA           | NA           | NA     | 355306 |
| cg16127514 | -0.0584894 | 0.05022455 | 6.69E-08 | 37 | 10 | 29273678  | NA           | NA        | NA                   | NA          | NA      | NA          | NA   | TRUE | NA          | NA           | NA           | TRUE   | 296832 |
| cg10119082 | 0.08361486 | -0.0661949 | 6.73E-08 | 37 | 7  | 98990626  | ARPC1B       | NM_005720 | Body                 | chr7:989901 | Island  | NA          | NA   | TRUE | 7:98828146- | 7:98990227-  | Promoter_A5  | TRUE   | 192776 |
| cg18923051 | 0.0397081  | -0.0272    | 6.78E-08 | 37 | 1  | 156053080 | MEX3A        | NM_001093 | TSS1500              | chr1:156051 | S_Shore | NA          | NA   | NA   | NA          | NA           | NA           | NA     | 343025 |
| cg13213009 | -0.1176743 | 0.10366464 | 6.79E-08 | 37 | 8  | 74903761  | LY96         | NM_015364 | 1stExon              | NA          | NA      | NA          | NA   | TRUE | NA          | NA           | NA           | NA     | 243693 |
| cg07815238 | -0.0350322 | 0.03255093 | 6.81E-08 | 37 | 15 | 64341005  | NA           | NA        | NA                   | chr15:64338 | S_Shelf | NA          | NA   | NA   | NA          | NA           | NA           | NA     | 152117 |
| cg18042806 | -0.0498538 | 0.04318544 | 6.85E-08 | 37 | 5  | 177659971 | AGXT2L2      | NM_153373 | TSS200               | chr5:177659 | S_Shore | NA          | NA   | NA   | NA          | 5:177658792  | Promoter_A5  | NA     | 328465 |
| cg14470121 | 0.04304037 | -0.0373973 | 6.87E-08 | 37 | 16 | 1587684   | IFT140;TME   | NM_014714 | Body;Body            | chr16:15876 | Island  | NA          | NA   | NA   | 16:1527106- | 16:1587536-  | Unclassified | NA     | 269051 |
| cg18485720 | 0.04161333 | -0.0222644 | 6.91E-08 | 37 | 19 | 720740    | PALM;PALM    | NM_002579 | Body;Body            | chr19:71909 | Island  | NA          | NA   | NA   | 19:670014-6 | 19:720678-7  | Unclassified | NA     | 336026 |
| cg03316098 | 0.02618801 | -0.0022561 | 6.99E-08 | 37 | 6  | 29601398  | GABBR1;GA    | NM_001470 | TSS1500;TSS1500      | chr6:296001 | S_Shore | NA          | NA   | NA   | 6:29601275- | Promoter_A5  | NA           | 67149  |        |
| cg08371947 | 0.05042274 | -0.0469614 | 7.01E-08 | 37 | 4  | 8477793   | C4orf23      | NM_152544 | 3'UTR                | NA          | NA      | NA          | NA   | NA   | 4:8528422-8 | NA           | NA           | NA     | 162338 |
| cg11317199 | 0.07783064 | -0.0743709 | 7.08E-08 | 37 | 9  | 100850391 | TRIM14;TRIN  | NM_014788 | Body;Body;Body;Body  | chr9:100849 | Island  | NA          | NA   | NA   | 9:99889558- | NA           | NA           | NA     | 213170 |
| cg14875081 | 0.03032039 | -0.0248111 | 7.26E-08 | 37 | 2  | 96814660  | NA           | NA        | NA                   | chr2:968104 | S_Shelf | NA          | DMR  | NA   | 2:96813678- | Promoter_A5  | TRUE         | 276638 |        |
| cg09975715 | 0.05736856 | -0.0545631 | 7.32E-08 | 37 | 17 | 8379050   | MYH10        | NM_005964 | 3'UTR                | chr17:83801 | N_Shore | NA          | NA   | NA   | 17:8319758- | NA           | NA           | NA     | 190199 |
| cg05379350 | 0.04261779 | -0.0318504 | 7.33E-08 | 37 | 17 | 27917157  | GIT1;GIT1    | NM_014030 | TSS1500;TSS1500      | chr17:27918 | N_Shore | NA          | NA   | NA   | 17:24939942 | NA           | NA           | NA     | 107026 |
| cg09696044 | 0.07115614 | -0.0817832 | 7.33E-08 | 37 | 20 | 55968294  | RBM38;RBM    | NM_017495 | Body;Body            | chr20:55966 | S_Shore | NA          | CDMR | TRUE | NA          | 20:55968089  | Promoter_A5  | NA     | 185474 |
| cg16204717 | -0.0582389 | 0.04955151 | 7.35E-08 | 37 | 12 | 65894458  | NA           | NA        | NA                   | NA          | NA      | NA          | NA   | TRUE | NA          | NA           | NA           | NA     | 298084 |
| cg02326058 | 0.08541132 | -0.0639368 | 7.40E-08 | 37 | 8  | 8993102   | NA           | NA        | NA                   | NA          | NA      | NA          | NA   | TRUE | NA          | NA           | NA           | NA     | 47477  |
| cg05360714 | 0.06945276 | -0.0403501 | 7.45E-08 | 37 | 17 | 75543046  | NA           | NA        | NA                   | NA          | NA      | low-CpG:730 | NA   | NA   | NA          | NA           | NA           | NA     | 106593 |
| cg15697019 | 0.05765846 | -0.0568832 | 7.48E-08 | 37 | 7  | 77357984  | RSBN1L       | NM_198467 | Body                 | NA          | NA      | NA          | NA   | TRUE | NA          | NA           | NA           | NA     | 289757 |
| cg19598514 | 0.03930879 | -0.0350199 | 7.50E-08 | 37 | 11 | 442149    | ANO9         | NM_001012 | TSS200               | NA          | NA      | NA          | NA   | TRUE | NA          | 11:441345-4  | Unclassified | TRUE   | 353304 |
| cg05372727 | -0.0577905 | 0.06012988 | 7.56E-08 | 37 | 13 | 107029018 | NA           | NA        | NA                   | NA          | NA      | NA          | NA   | NA   | 13:10702848 | Unclassified | NA           | 106869 |        |
| cg21934230 | 0.07329382 | -0.053646  | 7.57E-08 | 37 | 1  | 22802608  | WNT3A        | NM_033131 | Body                 | NA          | NA      | NA          | NA   | TRUE | NA          | NA           | NA           | TRUE   | 389571 |
| cg04368724 | 0.04400691 | -0.0393473 | 7.63E-08 | 37 | 6  | 31760593  | VARS         | NM_006295 | Body                 | chr6:317632 | N_Shelf | NA          | NA   | NA   | NA          | NA           | NA           | NA     | 87707  |
| cg10234998 | 0.04331226 | -0.0168772 | 7.71E-08 | 37 | 6  | 29601491  | GABBR1;GA    | NM_001470 | TSS1500;TSS1500      | chr6:296001 | S_Shore | NA          | NA   | NA   | NA          | NA           | NA           | NA     | 194951 |
| cg12061531 | -0.0456035 | 0.03226644 | 7.73E-08 | 37 | 17 | 21729912  | NA           | NA        | NA                   | chr17:21729 | Island  | NA          | NA   | NA   | 17:21653914 | NA           | NA           | NA     | 225605 |
| cg18643093 | 0.05059288 | -0.0597164 | 7.82E-08 | 37 | 5  | 150521257 | ANXA6;ANXA   | NM_001155 | Body;Body            | NA          | NA      | NA          | NA   | TRUE | NA          | 5:150521159  | Unclassified | NA     | 338512 |
| cg23534245 | -0.0377926 | 0.0291447  | 7.84E-08 | 37 | 20 | 6751435   | BMP2         | NM_001200 | Body                 | chr20:67480 | S_Shore | NA          | CDMR | NA   | NA          | NA           | NA           | NA     | 414515 |
| cg23459424 | -0.0922728 | 0.10663895 | 7        |    |    |           |              |           |                      |             |         |             |      |      |             |              |              |        |        |

|            |            |            |          |    |    |           |             |           |                      |              |         |             |      |      |             |             |              |      |        |
|------------|------------|------------|----------|----|----|-----------|-------------|-----------|----------------------|--------------|---------|-------------|------|------|-------------|-------------|--------------|------|--------|
| cg06193043 | 0.05959781 | -0.0505544 | 8.17E-08 | 37 | 1  | 11908199  | NPPA        | NM_006172 | TSS1500              | NA           | NA      | NA          | NA   | TRUE | NA          | NA          | NA           | NA   | 121633 |
| cg22509164 | 0.02749047 | -0.0166816 | 8.22E-08 | 37 | 1  | 46766957  | LRRRC41     | NM_006369 | Body                 | chr1:467674  | N_Shore | NA          | RDMR | NA   | NA          | NA          | NA           | NA   | 397748 |
| cg02454476 | -0.0357866 | 0.02160328 | 8.23E-08 | 37 | 15 | 68844912  | NA          | NA        | NA                   | NA           | NA      | NA          | NA   | TRUE | NA          | NA          | NA           | NA   | 49958  |
| cg25499181 | 0.05533784 | -0.0288711 | 8.29E-08 | 37 | 10 | 30894357  | NA          | NA        | NA                   | NA           | NA      | NA          | NA   | TRUE | NA          | NA          | NA           | TRUE | 446182 |
| cg01054110 | 0.06479094 | -0.0465536 | 8.33E-08 | 37 | 12 | 125002332 | NCOR2;NCO   | NM_006312 | 5'UTR;5'UTR          | chr12:12500  | Island  | NA          | NA   | NA   | 12:12356792 | NA          | NA           | NA   | 22208  |
| cg07626482 | -0.0321285 | 0.02273549 | 8.35E-08 | 37 | 19 | 47289503  | SLC1A5;SLC1 | NM_001145 | TSS1500;Body;5'UTR   | chr19:472903 | N_Shore | NA          | RDMR | NA   | NA          | NA          | NA           | NA   | 148720 |
| cg19744498 | 0.0645633  | -0.0561245 | 8.38E-08 | 37 | 2  | 208631081 | FZD5        | NM_003468 | 3'UTR                | chr2:2086311 | N_Shore | NA          | RDMR | NA   | NA          | NA          | NA           | NA   | 355810 |
| cg18437480 | 0.0390705  | -0.0534128 | 8.39E-08 | 37 | 17 | 76130305  | TMC8        | NM_152468 | Body                 | chr17:761275 | S_Shore | NA          | NA   | NA   | 17:73641728 | 17:76129950 | Promoter_A5  | TRUE | 335153 |
| cg16589830 | 0.08886424 | -0.0551971 | 8.43E-08 | 37 | 1  | 212284214 | NA          | NA        | NA                   | NA           | NA      | NA          | NA   | TRUE | NA          | NA          | NA           | NA   | 305057 |
| cg00290023 | -0.0341959 | 0.04294223 | 8.45E-08 | 37 | 5  | 174962968 | NA          | NA        | NA                   | NA           | NA      | NA          | NA   | TRUE | NA          | NA          | NA           | NA   | 6094   |
| cg00136405 | -0.0527359 | 0.03444912 | 8.57E-08 | 37 | 4  | 123542198 | IL21;IL21   | NM_021803 | 5'UTR;1stExon        | NA           | NA      | NA          | NA   | NA   | NA          | NA          | NA           | NA   | 3088   |
| cg03147185 | -0.0427911 | 0.03794551 | 8.62E-08 | 37 | 2  | 97008030  | NCAPH       | NM_015341 | Body                 | NA           | NA      | NA          | NA   | TRUE | NA          | 2:97007871  | Unclassified | NA   | 63943  |
| cg08512353 | 0.0460539  | -0.0268493 | 8.74E-08 | 37 | 11 | 134230036 | GLB1L2      | NM_138342 | Body                 | chr11:13423  | N_Shore | NA          | NA   | NA   | 11:13373524 | 11:13422985 | Unclassified | NA   | 164791 |
| cg20462883 | 0.03462113 | -0.0254741 | 8.90E-08 | 37 | 12 | 122461621 | BCL7A;BCL7  | NM_001024 | Body;Body            | NA           | NA      | NA          | RDMR | TRUE | 12:12094318 | 12:12246103 | Unclassified | NA   | 367124 |
| cg17416730 | 0.05928057 | -0.0600926 | 9.25E-08 | 37 | 6  | 33245541  | B3GALT4     | NM_003782 | 1stExon              | chr6:332446  | Island  | NA          | NA   | TRUE | 6:33352687  | 6:33244505  | Promoter_A5  | TRUE | 318688 |
| cg16764781 | 0.17736317 | -0.1282956 | 9.31E-08 | 37 | 3  | 189347820 | TP63;TP63;T | NM_001114 | TSS1500;TSS1500;TSS  | NA           | NA      | NA          | NA   | NA   | NA          | NA          | NA           | NA   | 308282 |
| cg25542319 | 0.07353082 | -0.0485267 | 9.41E-08 | 37 | 5  | 112540429 | MCC;MCC     | NM_002387 | Body;Body            | NA           | NA      | NA          | NA   | TRUE | NA          | 5:112540314 | Unclassified | NA   | 446800 |
| cg26182406 | -0.1331246 | 0.16433185 | 9.41E-08 | 37 | 14 | 105491309 | NA          | NA        | NA                   | chr14:10548  | S_Shelf | low-CpG:104 | NA   | NA   | NA          | 14:10549121 | Unclassified | TRUE | 456866 |
| cg22790839 | -0.0955114 | 0.0952336  | 9.44E-08 | 37 | 5  | 157883933 | NA          | NA        | NA                   | NA           | NA      | NA          | NA   | TRUE | NA          | NA          | NA           | TRUE | 402015 |
| cg21741998 | -0.0874003 | 0.074558   | 9.46E-08 | 37 | 6  | 36788637  | CPNE5       | NM_020939 | Body                 | NA           | NA      | NA          | NA   | TRUE | NA          | NA          | NA           | NA   | 386539 |
| cg23659289 | 0.04596797 | -0.0177813 | 9.48E-08 | 37 | 17 | 43472725  | ARHGAP27;A  | NM_199282 | 3'UTR;3'UTR          | chr17:43472  | Island  | NA          | NA   | TRUE | 17:40828323 | 17:43472209 | Gene_Assoc   | NA   | 416463 |
| cg03172931 | 0.04831599 | -0.0272779 | 9.61E-08 | 37 | 19 | 8677774   | NA          | NA        | NA                   | chr19:86743  | S_Shelf | NA          | NA   | NA   | NA          | 19:8677769  | Unclassified | NA   | 64446  |
| cg15684702 | 0.07347355 | -0.0223988 | 9.67E-08 | 37 | 1  | 45297445  | PTCH2;PTCH  | NM_001166 | Body;Body            | NA           | NA      | NA          | NA   | TRUE | NA          | NA          | NA           | NA   | 289535 |
| cg09906145 | 0.04461765 | -0.0346942 | 9.67E-08 | 37 | 16 | 67562424  | FAM65A      | NM_024519 | TSS1500              | chr16:67562  | N_Shore | NA          | NA   | NA   | NA          | 16:67562352 | Unclassified | TRUE | 189085 |
| cg09692396 | 0.04785677 | -0.036153  | 9.69E-08 | 37 | 12 | 7023346   | LRRRC23;ENO | NM_201650 | 3'UTR;TSS1500;3'UTR  | chr12:702324 | Island  | NA          | CDMR | NA   | 12:6893563  | 12:7023192  | Promoter_A5  | NA   | 185416 |
| cg06061002 | -0.0418961 | 0.02714199 | 9.70E-08 | 37 | 6  | 29638918  | MOG;MOG;A   | NM_206813 | 3'UTR;Body;3'UTR;Bod | NA           | NA      | NA          | NA   | NA   | NA          | NA          | NA           | NA   | 119339 |
| cg08824847 | -0.1161813 | 0.14272689 | 9.80E-08 | 37 | 11 | 35052388  | NA          | NA        | NA                   | NA           | NA      | NA          | NA   | TRUE | NA          | NA          | NA           | TRUE | 170243 |
| cg04494800 | 0.0372296  | -0.005855  | 9.82E-08 | 37 | 6  | 149775853 | ZC3H12D     | NM_207360 | Body                 | chr6:149777  | N_Shore | NA          | NA   | TRUE | NA          | NA          | NA           | TRUE | 90077  |
| cg12882189 | 0.05679611 | -0.0397473 | 9.84E-08 | 37 | 17 | 80402891  | C17orf62;C1 | NM_001100 | Body;Body;Body       | chr17:80401  | S_Shore | NA          | NA   | NA   | NA          | NA          | NA           | NA   | 238675 |
| cg01316378 | 0.07065748 | -0.0473573 | 9.84E-08 | 37 | 10 | 63629580  | NA          | NA        | NA                   | NA           | NA      | NA          | RDMR | TRUE | NA          | NA          | NA           | NA   | 27515  |
| cg10205045 | 0.04368126 | -0.0207442 | 9.85E-08 | 37 | 15 | 69087809  | ANP32A      | NM_006305 | Body                 | NA           | NA      | NA          | NA   | TRUE | 15:66874826 | 15:69087456 | Promoter_A5  | TRUE | 194409 |
| cg05954918 | -0.0588662 | 0.0536759  | 9.93E-08 | 37 | 1  | 21645238  | ECE1        | NM_001113 | Body                 | NA           | NA      | NA          | NA   | TRUE | NA          | NA          | NA           | NA   | 117401 |
| cg21255657 | 0.03242378 | -0.0178829 | 9.99E-08 | 37 | 17 | 77006304  | CANT1;CANT  | NM_138793 | TSS1500;TSS1500;TSS  | chr17:77005  | S_Shore | NA          | NA   | NA   | NA          | 17:77004720 | NonGene_A5   | NA   | 379645 |
